# Supplementary material for: Long-term Exposure to Ambient Ozone at Workplace is Positively and Non-linearly Associated with Incident Hypertension and Blood Pressure: Longitudinal Evidence from the Beijing-Tianjin-Hebei Medical Examination Cohort
Source: Research Square preprint supplement (doi:10.21203/rs.3.rs-3141767/v1), 2023-07-07
Supplement: Supplementary file 1 [file d36161fa2387874f25f0ffff.docx]

**Long-term Exposure to Ambient Ozone at Workplace is Positively and Non-linearly Associated with Incident Hypertension and Blood Pressure: Longitudinal Evidence from the Beijing-Tianjin-Hebei Medical Examination Cohort**

Songhua Hu1, 2†, Ximing Xu2†, Chunjun Li3, Li Zhang4, Xiaolong Xing5, Jiangshan He5, Pei Guo5, Jingbo Zhang6, Yujie Niu7, 8, Shuo Chen6, Rong Zhang7, 8, Feng Liu6, Shitao Ma7, 8, Mianzhi Zhang9,10, Fenghua Guo5 and Minying Zhang5*

1 School of Statistics and Data Science, Nankai University, Tianjin, China

2 Big Data Center for Children’s Medical Care, Children’s Hospital of Chongqing Medical University, National Clinical Research Center for Child Health and Disorders, Ministry of Education Key Laboratory of Child Development and Disorders, Chongqing, China

3 Tianjin Union Medical Center, Tianjin, China

4 Tianjin First Central Hospital, Tianjin, China

5 School of Medicine, Nankai University, Tianjin, China

6 Beijing Physical Examination Center, Beijing, China

7 Hebei Key Laboratory of Environment and Human Health, Shijiazhuang, China

8 Department of Occupational Health and Environmental Health, Hebei Medical University, Shijiazhuang, China

9 Dongfang Hospital, Beijing University of Chinese Medicine, Beijing, China

10 Tianjin Academy of Traditional Chinese Medicine Affiliated Hospital, Tianjin, China

† Songhua Hu and Ximing Xu are joint first authors.

* Corresponding author: Minying Zhang. E-mail address: [zhangminying@nankai.edu.cn](mailto:Zhangminying@nankai.edu.cn)

**Table of Contents**

[**Table S1** Relationship between long-term O3 exposure concentrations and hypertension derived from the nested frailty models. 3](#_Toc136529980)

[**Table S2** Relationship between long-term O3 exposure concentrations and DBP derived from the nested mixed-effects linear models. 5](#_Toc136529981)

[**Table S3** Relationship between long-term O3 exposure concentrations and SBP derived from the nested mixed-effects linear models. 7](#_Toc136529982)

[**Table S4** Relationship between long-term O3 exposure concentrations and PP derived from the nested mixed-effects linear models. 10](#_Toc136529983)

[**Table S5** Relationship between long-term O3 exposure concentrations and MAP derived from the nested mixed-effects linear models. 12](#_Toc136529984)

[**Table S6** *P* value for interaction terms of subgroup in the full models based on five outcomes. 15](#_Toc136529985)

[**Table S7** Results of the full nested mixed-effects model analysis after excluding 98 participants with self-reported hypertension. 15](#_Toc136529986)

[**Table S8** Results from the full nested mixed-effects model with diabetes and dyslipidemia replacing biochemical indicators. 18](#_Toc136529987)

**List of Figures**

[**Fig. S1.** Cumulative incidence of hypertension per 100 person-years during the follow-up period. 22](#_Toc134438465)

[**Fig. S2.** Subgroup effects estimated according to sex (male and female), age (≤44 and >44 years) and BMI (<25 and ≥25 kg/m2) for four outcomes based on fully nested mixed-effects linear models. 23](#_Toc134438466)

[**Fig. S3.** Two-pollutant and three-pollutant models involving the pollutants of PM2.5 and NO2 for four outcomes based on fully nested mixed-effects linear models. 24](#_Toc134438467)

[**Fig. S4.** Concentration-response curves of the association of 2-year average O3 exposure concentrations with hypertension, DBP, SBP, PP and MAP. 24](#_Toc134438468)

[**Fig. S5.** Concentration-response curves of the association of 1-year average O3 exposure concentrations with hypertension, DBP, SBP, PP and MAP. 25](#_Toc134438469)

**Table S1** Relationship between long-term O3 exposure concentrations and hypertension derived from the nested frailty models.

| **Model** | **HR (95% CI)** | **P-value** |
| --- | --- | --- |
| Model 1 |  |  |
| O3 (Q2 vs Q1) | 2.16 (1.68, 2.79) * | <0.001 |
| O3 (Q3 vs Q1) | 2.22 (1.57, 3.15) * | <0.001 |
| O3 (Q4 vs Q1) | 3.85 (2.86, 5.18) * | <0.001 |
| Model 2 (Model 1 + Sociodemographic characteristics) |  |  |
| O3 (Q2 vs Q1) | 2.11 (1.64, 2.72) * | <0.001 |
| O3 (Q3 vs Q1) | 2.36 (1.66, 3.35) * | <0.001 |
| O3 (Q4 vs Q1) | 3.96 (2.93, 5.34) * | <0.001 |
| Age (years) | 1.04 (1.03, 1.04) * | <0.001 |
| Sex (Male vs Female) | 2.33 (2.08, 2.62) * | <0.001 |
| Marital status (In a current marriage vs Single) | 0.84 (0.71, 1.01) | 0.060 |
| Marital status (Divorced or widowed vs Single) | 0.63 (0.37, 1.08) | 0.091 |
| Education level (College or undergraduate vs High school or below) | 0.80 (0.68, 0.94) * | 0.006 |
| Education level (Postgraduate vs High school or below) | 0.66 (0.52, 0.82) * | <0.001 |
| Model 3 (Model 2 + BMI) |  |  |
| O3 (Q2 vs Q1) | 2.01 (1.56, 2.60) * | <0.001 |
| O3 (Q3 vs Q1) | 2.31 (1.63, 3.28) * | <0.001 |
| O3 (Q4 vs Q1) | 3.76 (2.78, 5.09) * | <0.001 |
| Age (years) | 1.04 (1.03, 1.04) * | <0.001 |
| Sex (Male vs Female) | 1.93 (1.71, 2.17) * | <0.001 |
| Marital status (In a current marriage vs Single) | 0.80 (0.67, 0.95) * | 0.013 |
| Marital status (Divorced or widowed vs Single) | 0.62 (0.36, 1.07) | 0.086 |
| Education level (College or undergraduate vs High school or below) | 0.82 (0.69, 0.96) * | 0.016 |
| Education level (Postgraduate vs High school or below) | 0.70 (0.56, 0.87) * | 0.002 |
| BMI (kg/m2) | 1.10 (1.09, 1.12) * | <0.001 |
| Model 4 (Model 3 + Family history) |  |  |
| O3 (Q2 vs Q1) | 2.00 (1.55, 2.58) * | <0.001 |
| O3 (Q3 vs Q1) | 2.30 (1.62, 3.27) * | <0.001 |
| O3 (Q4 vs Q1) | 3.76 (2.78, 5.09) * | <0.001 |
| Age(years) | 1.04 (1.03, 1.04) * | <0.001 |
| Sex (Male vs Female) | 1.95 (1.73, 2.20) * | <0.001 |
| Marital status (In a current marriage vs Single) | 0.79 (0.66, 0.95) * | 0.012 |
| Marital status (Divorced or widowed vs Single) | 0.62 (0.36, 1.06) | 0.080 |
| Education level (College or undergraduate vs High school or below) | 0.81 (0.69, 0.96) * | 0.013 |
| Education level (Postgraduate vs High school or below) | 0.69 (0.55, 0.87) * | 0.001 |
| BMI (kg/m2) | 1.10 (1.09, 1.12) * | <0.001 |
| Family history of hypertension (Positive vs Negative) | 1.16 (1.04, 1.29) * | 0.010 |
| Family history of hypertension (Unknown vs Negative) | 1.01 (0.78, 1.30) | 0.964 |
| Model 5 (Model 4 + Indoor air pollution + Lifestyle factors) |  |  |
| O3 (Q2 vs Q1) | 1.85 (1.40, 2.43) * | <0.001 |
| O3 (Q3 vs Q1) | 2.21 (1.52, 3.19) * | <0.001 |
| O3 (Q4 vs Q1) | 3.65 (2.64, 5.06) * | <0.001 |
| Age (years) | 1.04 (1.03, 1.04) * | <0.001 |
| Sex (Male vs Female) | 1.99 (1.73, 2.29) * | <0.001 |
| Marital status (In a current marriage vs Single) | 0.81 (0.66, 0.98) * | 0.034 |
| Marital status (Divorced or widowed vs Single) | 0.50 (0.27, 0.95) * | 0.033 |
| Education level (College or undergraduate vs High school or below) | 0.83 (0.69, 0.98) * | 0.030 |
| Education level (Postgraduate vs High school or below) | 0.68 (0.54, 0.87) * | 0.002 |
| BMI (kg/m2) | 1.10 (1.08, 1.12) * | <0.001 |
| Family history of hypertension (Positive vs Negative) | 1.18 (1.05, 1.33) * | 0.006 |
| Family history of hypertension (Unknown vs Negative) | 1.04 (0.79, 1.36) | 0.781 |
| Daily cooking time (0–1 hour vs 0 hours) | 0.94 (0.81, 1.08) | 0.382 |
| Daily cooking time (>1 hour vs 0 hours) | 0.91 (0.77, 1.08) | 0.275 |
| Night sleep duration (<7 hours/day vs 7–8 hours/day) | 0.85 (0.69, 1.05) | 0.126 |
| Night sleep duration (>8 hours/day vs 7–8 hours/day) | 0.96 (0.81, 1.13) | 0.601 |
| Smoking (Current vs Never) | 0.92 (0.79, 1.07) | 0.276 |
| Smoking (Former vs Never) | 1.07 (0.79, 1.44) | 0.664 |
| Alcohol drinking (Current vs Never) | 1.09 (0.95, 1.24) | 0.235 |
| Alcohol drinking (Former vs Never) | 0.93 (0.60, 1.43) | 0.729 |
| Physical exercise (Yes vs No) | 1.07 (0.94, 1.20) | 0.310 |
| Model 6 (Model 5 + Personal protective measures against air pollution) |  |  |
| O3 (Q2 vs Q1) | 1.85 (1.40, 2.43) * | <0.001 |
| O3 (Q3 vs Q1) | 2.20 (1.52, 3.18) * | <0.001 |
| O3 (Q4 vs Q1) | 3.61 (2.61, 5.00) * | <0.001 |
| Age (years) | 1.04 (1.03, 1.04) * | <0.001 |
| Sex (Male vs Female) | 1.97 (1.71, 2.27) * | <0.001 |
| Marital status (In a current marriage vs Single) | 0.81 (0.67, 0.99) * | 0.037 |
| Marital status (Divorced or widowed vs Single) | 0.51 (0.27, 0.96) * | 0.036 |
| Education level (College or undergraduate vs High school or below) | 0.83 (0.70, 0.99) * | 0.034 |
| Education level (Postgraduate vs High school or below) | 0.69 (0.54, 0.88) * | 0.003 |
| BMI (kg/m2) | 1.10 (1.08, 1.12) * | <0.001 |
| Family history of hypertension (Positive vs Negative) | 1.18 (1.05, 1.33) * | 0.006 |
| Family history of hypertension (Unknown vs Negative) | 1.04 (0.79, 1.36) | 0.785 |
| Daily cooking time (0–1 hour vs 0 hours) | 0.94 (0.82, 1.09) | 0.414 |
| Daily cooking time (>1 hour vs 0 hours) | 0.92 (0.78, 1.09) | 0.322 |
| Night sleep duration (<7 hours/day vs 7–8 hours/day) | 0.85 (0.69, 1.05) | 0.123 |
| Night sleep duration (>8 hours/day vs 7–8 hours/day) | 0.96 (0.81, 1.13) | 0.595 |
| Smoking (Current vs Never) | 0.92 (0.79, 1.07) | 0.271 |
| Smoking (Former vs Never) | 1.07 (0.79, 1.44) | 0.672 |
| Alcohol drinking (Current vs Never) | 1.09 (0.95, 1.24) | 0.230 |
| Alcohol drinking (Former vs Never) | 0.93 (0.60, 1.43) | 0.732 |
| Physical exercise (Yes vs No) | 1.07 (0.95, 1.21) | 0.282 |
| Mask usage (Yes vs No) | 0.96 (0.85, 1.10) | 0.594 |
| Air purifier usage (Yes vs No) | 0.96 (0.84, 1.10) | 0.597 |
| Model 7 (Model 6 + Biochemical indicators and chronic diseases) |  |  |
| O3 (Q2 vs Q1) | 1.77 (1.34, 2.36) * | <0.001 |
| O3 (Q3 vs Q1) | 2.06 (1.42, 3.00) * | <0.001 |
| O3 (Q4 vs Q1) | 3.43 (2.46, 4.79) * | <0.001 |
| Age (years) | 1.03 (1.03, 1.04) * | <0.001 |
| Sex (Male vs Female) | 1.88 (1.62, 2.19) * | <0.001 |
| Marital status (In a current marriage vs Single) | 0.81 (0.66, 0.99) * | 0.042 |
| Marital status (Divorced or widowed vs Single) | 0.58 (0.31, 1.09) | 0.093 |
| Education level (College or undergraduate vs High school or below) | 0.84 (0.70, 1.00) | 0.050 |
| Education level (Postgraduate vs High school or below) | 0.69 (0.54, 0.89) * | 0.004 |
| BMI (kg/m2) | 1.09 (1.07, 1.11) * | <0.001 |
| Family history of hypertension (Positive vs Negative) | 1.18 (1.05, 1.33) * | 0.007 |
| Family history of hypertension (Unknown vs Negative) | 1.05 (0.80, 1.38) | 0.741 |
| Daily cooking time (0–1 hour vs 0 hours) | 0.95 (0.82, 1.10) | 0.521 |
| Daily cooking time (>1 hour vs 0 hours) | 0.93 (0.78, 1.11) | 0.414 |
| Night sleep duration (<7 hours/day vs 7–8 hours/day) | 0.86 (0.70, 1.06) | 0.162 |
| Night sleep duration (>8 hours/day vs 7–8 hours/day) | 0.96 (0.81, 1.14) | 0.639 |
| Smoking (Current vs Never) | 0.90 (0.78, 1.05) | 0.186 |
| Smoking (Former vs Never) | 1.10 (0.82, 1.48) | 0.532 |
| Alcohol drinking (Current vs Never) | 1.07 (0.93, 1.23) | 0.335 |
| Alcohol drinking (Former vs Never) | 0.91 (0.58, 1.41) | 0.662 |
| Physical exercise (Yes vs No) | 1.08 (0.95, 1.22) | 0.249 |
| Mask usage (Yes vs No) | 0.95 (0.83, 1.08) | 0.437 |
| Air purifier usage (Yes vs No) | 0.96 (0.84, 1.10) | 0.569 |
| FBG (mmol/L) | 1.04 (1.00, 1.09) | 0.051 |
| TG (mmol/L) | 1.01 (0.95, 1.07) | 0.776 |
| TC (mmol/L) | 1.15 (0.99, 1.33) | 0.063 |
| LDL-C (mmol/L) | 0.98 (0.83, 1.16) | 0.814 |
| HDL-C (mmol/L) | 0.76 (0.58, 0.99) * | 0.042 |
| CHD (Yes vs No) | 0.81 (0.44, 1.50) | 0.507 |
| Cancer (Yes vs No) | 0.53 (0.17, 1.69) | 0.286 |

Note: HR, hazard ratio; CI, confidence interval; O3, ozone; BMI, body mass index; FBG, fasting blood glucose; TG, triglyceride; TC, total cholesterol; LDL-C, low-density lipoprotein cholesterol; HDL-C, high-density lipoprotein cholesterol; CHD, coronary heart disease; vs, versus; Q1–Q4, the first to the fourth quartile groups of O3 exposure concentrations.

* P-value < 0.05.

**Table S2** Relationship between long-term O3 exposure concentrations and DBP derived from the nested mixed-effects linear models.

| **Model** | **(95% CI)** | **P-value** |
| --- | --- | --- |
| Model 1 |  |  |
| O3 (Q2 vs Q1) | 1.06 (0.50, 1.62) * | <0.001 |
| O3 (Q3 vs Q1) | 0.59 (−0.16, 1.34) | 0.124 |
| O3 (Q4 vs Q1) | 0.71 (0.09, 1.34) * | 0.026 |
| Model 2 (Model 1 + Sociodemographic characteristics) |  |  |
| O3 (Q2 vs Q1) | 1.02 (0.46, 1.58) * | <0.001 |
| O3 (Q3 vs Q1) | 0.59 (−0.16, 1.34) | 0.124 |
| O3 (Q4 vs Q1) | 0.70 (0.07, 1.33) * | 0.029 |
| Age (years) | 0.02 (0.01, 0.04) * | 0.007 |
| Sex (Male vs Female) | 0.83 (0.56, 1.10) * | <0.001 |
| Marital status (In a current marriage vs Single) | 0.31 (−0.07, 0.69) | 0.108 |
| Marital status (Divorced or widowed vs Single) | 0.37 (−0.84, 1.59) | 0.547 |
| Education level (College or undergraduate vs High school or below) | −0.16 (−0.61, 0.28) | 0.474 |
| Education level (Postgraduate vs High school or below) | −0.37 (−0.93, 0.18) | 0.187 |
| Model 3 (Model 2 + BMI) |  |  |
| O3 (Q2 vs Q1) | 1.03 (0.47, 1.59) * | <0.001 |
| O3 (Q3 vs Q1) | 0.55 (−0.20, 1.31) | 0.151 |
| O3 (Q4 vs Q1) | 0.67 (0.03, 1.30) * | 0.039 |
| Age (years) | 0.02 (0.00, 0.04) * | 0.011 |
| Sex (Male vs Female) | 0.71 (0.43, 1.00) * | <0.001 |
| Marital status (In a current marriage vs Single) | 0.30 (−0.08, 0.69) | 0.123 |
| Marital status (Divorced or widowed vs Single) | 0.45 (−0.78, 1.68) | 0.471 |
| Education level (College or undergraduate vs High school or below) | −0.16 (−0.61, 0.29) | 0.479 |
| Education level (Postgraduate vs High school or below) | −0.39 (−0.95, 0.17) | 0.170 |
| BMI (kg/m2) | 0.06 (0.02, 0.10) * | 0.004 |
| Model 4 (Model 3 + Family history) |  |  |
| O3 (Q2 vs Q1) | 1.02 (0.46, 1.59) * | <0.001 |
| O3 (Q3 vs Q1) | 0.56 (−0.20, 1.31) | 0.150 |
| O3 (Q4 vs Q1) | 0.67 (0.04, 1.31) * | 0.037 |
| Age(years) | 0.02 (0.00, 0.04) * | 0.012 |
| Sex (Male vs Female) | 0.73 (0.44, 1.01) * | <0.001 |
| Marital status (In a current marriage vs Single) | 0.30 (−0.09, 0.68) | 0.130 |
| Marital status (Divorced or widowed vs Single) | 0.44 (−0.78, 1.67) | 0.478 |
| Education level (College or undergraduate vs High school or below) | −0.17 (−0.62, 0.28) | 0.448 |
| Education level (Postgraduate vs High school or below) | −0.40 (−0.96, 0.15) | 0.157 |
| BMI (kg/m2) | 0.06 (0.02, 0.10) * | 0.004 |
| Family history of hypertension (Positive vs Negative) | 0.13 (−0.14, 0.41) | 0.351 |
| Family history of hypertension (Unknown vs Negative) | −0.16 (−0.73, 0.40) | 0.568 |
| Model 5 (Model 4 + Indoor air pollution + Lifestyle factors) |  |  |
| O3 (Q2 vs Q1) | 0.99 (0.39, 1.59) * | 0.001 |
| O3 (Q3 vs Q1) | 0.54 (−0.26, 1.34) | 0.187 |
| O3 (Q4 vs Q1) | 0.56 (−0.12, 1.24) | 0.105 |
| Age (years) | 0.02 (0.00, 0.04) * | 0.027 |
| Sex (Male vs Female) | 0.79 (0.44, 1.14) * | <0.001 |
| Marital status (In a current marriage vs Single) | 0.28 (−0.14, 0.70) | 0.194 |
| Marital status (Divorced or widowed vs Single) | −0.05 (−1.38, 1.28) | 0.939 |
| Education level (College or undergraduate vs High school or below) | −0.23 (−0.70, 0.25) | 0.346 |
| Education level (Postgraduate vs High school or below) | −0.55 (−1.14, 0.05) | 0.070 |
| BMI (kg/m2) | 0.04 (−0.01, 0.08) | 0.084 |
| Family history of hypertension (Positive vs Negative) | 0.15 (−0.14, 0.45) | 0.309 |
| Family history of hypertension (Unknown vs Negative) | −0.20 (−0.80, 0.39) | 0.505 |
| Daily cooking time (0–1 hour vs 0 hours) | −0.01 (−0.35, 0.32) | 0.935 |
| Daily cooking time (>1 hour vs 0 hours) | 0.16 (−0.25, 0.57) | 0.448 |
| Night sleep duration (<7 hours/day vs 7–8 hours/day) | −0.13 (−0.66, 0.41) | 0.639 |
| Night sleep duration (>8 hours/day vs 7–8 hours/day) | 0.33 (−0.05, 0.72) | 0.092 |
| Smoking (Current vs Never) | −0.15 (−0.59, 0.28) | 0.493 |
| Smoking (Former vs Never) | −0.45 (−1.37, 0.46) | 0.334 |
| Alcohol drinking (Current vs Never) | 0.22 (−0.16, 0.60) | 0.262 |
| Alcohol drinking (Former vs Never) | 0.31 (−1.12, 1.73) | 0.672 |
| Physical exercise (Yes vs No) | −0.15 (−0.46, 0.16) | 0.342 |
| Model 6 (Model 5 + Personal protective measures against air pollution) |  |  |
| O3 (Q2 vs Q1) | 0.98 (0.38, 1.59) * | 0.001 |
| O3 (Q3 vs Q1) | 0.51 (−0.29, 1.31) | 0.212 |
| O3 (Q4 vs Q1) | 0.53 (−0.15, 1.21) | 0.126 |
| Age (years) | 0.02 (0.00, 0.04) * | 0.039 |
| Sex (Male vs Female) | 0.77 (0.42, 1.12) * | <0.001 |
| Marital status (In a current marriage vs Single) | 0.32 (−0.11, 0.74) | 0.142 |
| Marital status (Divorced or widowed vs Single) | −0.02 (−1.35, 1.32) | 0.980 |
| Education level (College or undergraduate vs High school or below) | −0.20 (−0.68, 0.27) | 0.402 |
| Education level (Postgraduate vs High school or below) | −0.51 (−1.10, 0.09) | 0.097 |
| BMI (kg/m2) | 0.04 (−0.01, 0.08) | 0.089 |
| Family history of hypertension (Positive vs Negative) | 0.17 (−0.13, 0.46) | 0.267 |
| Family history of hypertension (Unknown vs Negative) | −0.21 (−0.81, 0.39) | 0.488 |
| Daily cooking time (0–1 hour vs 0 hours) | 0.00 (−0.33, 0.34) | 0.986 |
| Daily cooking time (>1 hour vs 0 hours) | 0.18 (−0.23, 0.59) | 0.381 |
| Night sleep duration (<7 hours/day vs 7–8 hours/day) | −0.13 (−0.66, 0.40) | 0.631 |
| Night sleep duration (>8 hours/day vs 7–8 hours/day) | 0.34 (−0.05, 0.72) | 0.089 |
| Smoking (Current vs Never) | −0.15 (−0.59, 0.29) | 0.502 |
| Smoking (Former vs Never) | −0.46 (−1.38, 0.46) | 0.325 |
| Alcohol drinking (Current vs Never) | 0.22 (−0.16, 0.60) | 0.255 |
| Alcohol drinking (Former vs Never) | 0.31 (−1.11, 1.74) | 0.668 |
| Physical exercise (Yes vs No) | −0.14 (−0.45, 0.18) | 0.393 |
| Mask usage (Yes vs No) | −0.04 (−0.36, 0.28) | 0.817 |
| Air purifier usage (Yes vs No) | −0.26 (−0.58, 0.05) | 0.105 |
| Model 7 (Model 6 + Biochemical indicators and chronic diseases) |  |  |
| O3 (Q2 vs Q1) | 0.65 (0.01, 1.30) * | 0.047 |
| O3 (Q3 vs Q1) | 0.28 (−0.54, 1.10) | 0.502 |
| O3 (Q4 vs Q1) | 0.33 (−0.38, 1.03) | 0.369 |
| Age (years) | 0.02 (0.00, 0.04) * | 0.018 |
| Sex (Male vs Female) | 0.67 (0.30, 1.03) * | <0.001 |
| Marital status (In a current marriage vs Single) | 0.30 (−0.14, 0.73) | 0.186 |
| Marital status (Divorced or widowed vs Single) | 0.20 (−1.17, 1.56) | 0.776 |
| Education level (College or undergraduate vs High school or below) | −0.06 (−0.54, 0.42) | 0.809 |
| Education level (Postgraduate vs High school or below) | −0.38 (−0.99, 0.23) | 0.217 |
| BMI (kg/m2) | 0.02 (−0.03, 0.07) | 0.391 |
| Family history of hypertension (Positive vs Negative) | 0.17 (−0.13, 0.47) | 0.277 |
| Family history of hypertension (Unknown vs Negative) | −0.12 (−0.73, 0.49) | 0.701 |
| Daily cooking time (0–1 hour vs 0 hours) | −0.04 (−0.38, 0.31) | 0.833 |
| Daily cooking time (>1 hour vs 0 hours) | 0.13 (−0.29, 0.55) | 0.549 |
| Night sleep duration (<7 hours/day vs 7–8 hours/day) | −0.11 (−0.65, 0.44) | 0.705 |
| Night sleep duration (>8 hours/day vs 7–8 hours/day) | 0.31 (−0.09, 0.70) | 0.129 |
| Smoking (Current vs Never) | −0.06 (−0.50, 0.38) | 0.793 |
| Smoking (Former vs Never) | −0.40 (−1.34, 0.53) | 0.396 |
| Alcohol drinking (Current vs Never) | 0.26 (−0.13, 0.64) | 0.190 |
| Alcohol drinking (Former vs Never) | 0.25 (−1.19, 1.70) | 0.732 |
| Physical exercise (Yes vs No) | −0.11 (−0.43, 0.20) | 0.480 |
| Mask usage (Yes vs No) | 0.00 (−0.33, 0.32) | 0.987 |
| Air purifier usage (Yes vs No) | −0.22 (−0.54, 0.10) | 0.180 |
| FBG (mmol/L) | −0.11 (−0.27, 0.04) | 0.140 |
| TG (mmol/L) | −0.02 (−0.20, 0.16) | 0.840 |
| TC (mmol/L) | −0.10 (−0.55, 0.34) | 0.648 |
| LDL-C (mmol/L) | 0.12 (−0.37, 0.61) | 0.634 |
| HDL-C (mmol/L) | −0.67 (−1.34, 0.00) * | 0.050 |
| CHD (Yes vs No) | 0.32 (−1.53, 2.18) | 0.731 |
| Cancer (Yes vs No) | −0.05 (−2.13, 2.02) | 0.960 |

Note: CI, confidence interval; O3, ozone; BMI, body mass index; FBG, fasting blood glucose; TG, triglyceride; TC, total cholesterol; LDL-C, low-density lipoprotein cholesterol; HDL-C, high-density lipoprotein cholesterol; CHD, coronary heart disease; vs, versus; Q1–Q4, the first to the fourth quartile groups of O3 exposure concentrations.

a represents the average increase in the outcomes compared to Q1.

* P-value < 0.05.

**Table S3** Relationship between long-term O3 exposure concentrations and SBP derived from the nested mixed-effects linear models.

| **Model** | **(95% CI)** | **P-value** |
| --- | --- | --- |
| Model 1 |  |  |
| O3 (Q2 vs Q1) | 3.77 (2.99, 4.55) * | <0.001 |
| O3 (Q3 vs Q1) | 3.11 (2.07, 4.15) * | <0.001 |
| O3 (Q4 vs Q1) | 3.30 (2.43, 4.17) * | <0.001 |
| Model 2 (Model 1 + Sociodemographic characteristics) |  |  |
| O3 (Q2 vs Q1) | 3.72 (2.94, 4.50) * | <0.001 |
| O3 (Q3 vs Q1) | 3.13 (2.09, 4.16) * | <0.001 |
| O3 (Q4 vs Q1) | 3.34 (2.47, 4.21) * | <0.001 |
| Age (years) | 0.09 (0.07, 0.11) * | <0.001 |
| Sex (Male vs Female) | 0.26 (−0.12, 0.63) | 0.183 |
| Marital status (In a current marriage vs Single) | 0.35 (−0.19, 0.89) | 0.201 |
| Marital status (Divorced or widowed vs Single) | 0.33 (−1.38, 2.05) | 0.704 |
| Education level (College or undergraduate vs High school or below) | −0.49 (−1.12, 0.14) | 0.124 |
| Education level (Postgraduate vs High school or below) | −0.89 (−1.67, −0.11) * | 0.025 |
| Model 3 (Model 2 + BMI) |  |  |
| O3 (Q2 vs Q1) | 3.60 (2.82, 4.38) * | <0.001 |
| O3 (Q3 vs Q1) | 2.99 (1.95, 4.02) * | <0.001 |
| O3 (Q4 vs Q1) | 3.23 (2.36, 4.10) * | <0.001 |
| Age (years) | 0.09 (0.06, 0.11) * | <0.001 |
| Sex (Male vs Female) | 0.04 (−0.36, 0.44) | 0.846 |
| Marital status (In a current marriage vs Single) | 0.31 (−0.23, 0.85) | 0.257 |
| Marital status (Divorced or widowed vs Single) | 0.39 (−1.34, 2.12) | 0.659 |
| Education level (College or undergraduate vs High school or below) | −0.49 (−1.12, 0.14) | 0.128 |
| Education level (Postgraduate vs High school or below) | −0.90 (−1.69, −0.12) * | 0.024 |
| BMI (kg/m2) | 0.10 (0.04, 0.15) * | <0.001 |
| Model 4 (Model 3 + Family history) |  |  |
| O3 (Q2 vs Q1) | 3.59 (2.81, 4.37) * | <0.001 |
| O3 (Q3 vs Q1) | 2.99 (1.96, 4.03) * | <0.001 |
| O3 (Q4 vs Q1) | 3.24 (2.37, 4.11) * | <0.001 |
| Age(years) | 0.09 (0.06, 0.11) * | <0.001 |
| Sex (Male vs Female) | 0.08 (−0.32, 0.48) | 0.707 |
| Marital status (In a current marriage vs Single) | 0.30 (−0.24, 0.84) | 0.282 |
| Marital status (Divorced or widowed vs Single) | 0.35 (−1.38, 2.08) | 0.691 |
| Education level (College or undergraduate vs High school or below) | −0.53 (−1.16, 0.10) | 0.100 |
| Education level (Postgraduate vs High school or below) | −0.95 (−1.73, −0.16) * | 0.018 |
| BMI (kg/m2) | 0.09 (0.04, 0.15) * | <0.001 |
| Family history of hypertension (Positive vs Negative) | 0.46 (0.07, 0.84) * | 0.021 |
| Family history of hypertension (Unknown vs Negative) | −0.05 (−0.84, 0.74) | 0.907 |
| Model 5 (Model 4 + Indoor air pollution + Lifestyle factors) |  |  |
| O3 (Q2 vs Q1) | 3.53 (2.70, 4.36) * | <0.001 |
| O3 (Q3 vs Q1) | 3.06 (1.97, 4.15) * | <0.001 |
| O3 (Q4 vs Q1) | 3.20 (2.27, 4.13) * | <0.001 |
| Age (years) | 0.08 (0.06, 0.10) * | <0.001 |
| Sex (Male vs Female) | 0.34 (−0.15, 0.84) | 0.172 |
| Marital status (In a current marriage vs Single) | 0.45 (−0.15, 1.04) | 0.142 |
| Marital status (Divorced or widowed vs Single) | −0.19 (−2.08, 1.70) | 0.843 |
| Education level (College or undergraduate vs High school or below) | −0.72 (−1.39, −0.05) * | 0.034 |
| Education level (Postgraduate vs High school or below) | −1.15 (−1.99, −0.32) * | 0.007 |
| BMI (kg/m2) | 0.07 (0.01, 0.14) * | 0.015 |
| Family history of hypertension (Positive vs Negative) | 0.53 (0.11, 0.94) * | 0.013 |
| Family history of hypertension (Unknown vs Negative) | −0.01 (−0.86, 0.83) | 0.978 |
| Daily cooking time (0–1 hour vs 0 hours) | −0.07 (−0.55, 0.41) | 0.779 |
| Daily cooking time (>1 hour vs 0 hours) | −0.08 (−0.66, 0.49) | 0.774 |
| Night sleep duration (<7 hours/day vs 7–8 hours/day) | 0.15 (−0.61, 0.90) | 0.706 |
| Night sleep duration (>8 hours/day vs 7–8 hours/day) | 0.00 (−0.54, 0.55) | 0.986 |
| Smoking (Current vs Never) | −0.44 (−1.05, 0.18) | 0.166 |
| Smoking (Former vs Never) | −1.56 (−2.86, −0.26) * | 0.018 |
| Alcohol drinking (Current vs Never) | 0.33 (−0.21, 0.86) | 0.237 |
| Alcohol drinking (Former vs Never) | 0.99 (−1.03, 3.01) | 0.337 |
| Physical exercise (Yes vs No) | −0.35 (−0.79, 0.09) | 0.122 |
| Model 6 (Model 5 + Personal protective measures against air pollution) |  |  |
| O3 (Q2 vs Q1) | 3.53 (2.70, 4.36) * | <0.001 |
| O3 (Q3 vs Q1) | 3.05 (1.95, 4.14) * | <0.001 |
| O3 (Q4 vs Q1) | 3.17 (2.24, 4.11) * | <0.001 |
| Age (years) | 0.08 (0.05, 0.10) * | <0.001 |
| Sex (Male vs Female) | 0.28 (−0.21, 0.78) | 0.264 |
| Marital status (In a current marriage vs Single) | 0.52 (−0.08, 1.12) | 0.092 |
| Marital status (Divorced or widowed vs Single) | −0.13 (−2.01, 1.76) | 0.897 |
| Education level (College or undergraduate vs High school or below) | −0.68 (−1.35, −0.01) * | 0.046 |
| Education level (Postgraduate vs High school or below) | −1.08 (−1.92, −0.24) * | 0.012 |
| BMI (kg/m2) | 0.07 (0.01, 0.13) * | 0.017 |
| Family history of hypertension (Positive vs Negative) | 0.55 (0.13, 0.96) * | 0.010 |
| Family history of hypertension (Unknown vs Negative) | −0.05 (−0.89, 0.80) | 0.914 |
| Daily cooking time (0–1 hour vs 0 hours) | −0.04 (−0.52, 0.44) | 0.868 |
| Daily cooking time (>1 hour vs 0 hours) | −0.04 (−0.62, 0.54) | 0.905 |
| Night sleep duration (<7 hours/day vs 7–8 hours/day) | 0.14 (−0.62, 0.89) | 0.726 |
| Night sleep duration (>8 hours/day vs 7–8 hours/day) | 0.01 (−0.54, 0.56) | 0.974 |
| Smoking (Current vs Never) | −0.45 (−1.07, 0.17) | 0.156 |
| Smoking (Former vs Never) | −1.58 (−2.88, −0.28) * | 0.017 |
| Alcohol drinking (Current vs Never) | 0.32 (−0.22, 0.86) | 0.248 |
| Alcohol drinking (Former vs Never) | 0.98 (−1.04, 3.00) | 0.340 |
| Physical exercise (Yes vs No) | −0.31 (−0.75, 0.13) | 0.167 |
| Mask usage (Yes vs No) | −0.35 (−0.80, 0.10) | 0.125 |
| Air purifier usage (Yes vs No) | −0.41 (−0.85, 0.04) | 0.073 |
| Model 7 (Model 6 + Biochemical indicators and chronic diseases) |  |  |
| O3 (Q2 vs Q1) | 2.88 (2.00, 3.77) * | <0.001 |
| O3 (Q3 vs Q1) | 2.49 (1.36, 3.61) * | <0.001 |
| O3 (Q4 vs Q1) | 2.61 (1.64, 3.58) * | <0.001 |
| Age (years) | 0.07 (0.05, 0.10) * | <0.001 |
| Sex (Male vs Female) | 0.15 (−0.37, 0.67) | 0.575 |
| Marital status (In a current marriage vs Single) | 0.66 (0.04, 1.28) * | 0.038 |
| Marital status (Divorced or widowed vs Single) | 0.17 (−1.77, 2.11) | 0.863 |
| Education level (College or undergraduate vs High school or below) | −0.50 (−1.18, 0.19) | 0.153 |
| Education level (Postgraduate vs High school or below) | −0.91 (−1.77, −0.05) * | 0.038 |
| BMI (kg/m2) | 0.03 (−0.04, 0.10) | 0.364 |
| Family history of hypertension (Positive vs Negative) | 0.54 (0.12, 0.97) * | 0.013 |
| Family history of hypertension (Unknown vs Negative) | 0.02 (−0.85, 0.89) | 0.961 |
| Daily cooking time (0–1 hour vs 0 hours) | −0.04 (−0.53, 0.45) | 0.875 |
| Daily cooking time (>1 hour vs 0 hours) | −0.06 (−0.66, 0.53) | 0.841 |
| Night sleep duration (<7 hours/day vs 7–8 hours/day) | 0.28 (−0.49, 1.05) | 0.479 |
| Night sleep duration (>8 hours/day vs 7–8 hours/day) | 0.01 (−0.55, 0.58) | 0.959 |
| Smoking (Current vs Never) | −0.41 (−1.04, 0.23) | 0.208 |
| Smoking (Former vs Never) | −1.44 (−2.76, −0.12) * | 0.033 |
| Alcohol drinking (Current vs Never) | 0.33 (−0.22, 0.88) | 0.239 |
| Alcohol drinking (Former vs Never) | 0.70 (−1.35, 2.75) | 0.505 |
| Physical exercise (Yes vs No) | −0.24 (−0.69, 0.20) | 0.286 |
| Mask usage (Yes vs No) | −0.35 (−0.81, 0.11) | 0.139 |
| Air purifier usage (Yes vs No) | −0.38 (−0.84, 0.07) | 0.101 |
| FBG (mmol/L) | 0.02 (−0.19, 0.24) | 0.847 |
| TG (mmol/L) | −0.06 (−0.31, 0.20) | 0.669 |
| TC (mmol/L) | 0.14 (−0.48, 0.77) | 0.656 |
| LDL-C (mmol/L) | 0.00 (−0.69, 0.69) | 0.992 |
| HDL-C (mmol/L) | −0.95 (−1.90, 0.00) * | 0.049 |
| CHD (Yes vs No) | 1.86 (−0.77, 4.49) | 0.167 |
| Cancer (Yes vs No) | −2.30 (−5.25, 0.64) | 0.125 |

Note: CI, confidence interval; O3, ozone; BMI, body mass index; FBG, fasting blood glucose; TG, triglyceride; TC, total cholesterol; LDL-C, low-density lipoprotein cholesterol; HDL-C, high-density lipoprotein cholesterol; CHD, coronary heart disease; vs, versus; Q1–Q4, the first to the fourth quartile groups of O3 exposure concentrations.

a represents the average increase in the outcomes compared to Q1.

* P-value < 0.05.

**Table S4** Relationship between long-term O3 exposure concentrations and PP derived from the nested mixed-effects linear models.

| **Model** | **(95% CI)** | **P-value** |
| --- | --- | --- |
| Model 1 |  |  |
| O3 (Q2 vs Q1) | 2.63 (1.97, 3.30) * | <0.001 |
| O3 (Q3 vs Q1) | 2.35 (1.56, 3.15) * | <0.001 |
| O3 (Q4 vs Q1) | 2.48 (1.79, 3.16) * | <0.001 |
| Model 2 (Model 1 + Sociodemographic characteristics) |  |  |
| O3 (Q2 vs Q1) | 2.61 (1.95, 3.28) * | <0.001 |
| O3 (Q3 vs Q1) | 2.35 (1.55, 3.14) * | <0.001 |
| O3 (Q4 vs Q1) | 2.51 (1.82, 3.19) * | <0.001 |
| Age (years) | 0.07 (0.05, 0.09) * | <0.001 |
| Sex (Male vs Female) | −0.59 (−0.91, −0.27) * | <0.001 |
| Marital status (In a current marriage vs Single) | 0.05 (−0.41, 0.51) | 0.830 |
| Marital status (Divorced or widowed vs Single) | −0.01 (−1.46, 1.45) | 0.993 |
| Education level (College or undergraduate vs High school or below) | −0.29 (−0.83, 0.25) | 0.288 |
| Education level (Postgraduate vs High school or below) | −0.48 (−1.15, 0.18) | 0.156 |
| Model 3 (Model 2 + BMI) |  |  |
| O3 (Q2 vs Q1) | 2.50 (1.84, 3.17) * | <0.001 |
| O3 (Q3 vs Q1) | 2.29 (1.49, 3.08) * | <0.001 |
| O3 (Q4 vs Q1) | 2.46 (1.77, 3.15) * | <0.001 |
| Age (years) | 0.07 (0.05, 0.09) * | <0.001 |
| Sex (Male vs Female) | −0.68 (−1.02, −0.34) * | <0.001 |
| Marital status (In a current marriage vs Single) | 0.02 (−0.44, 0.48) | 0.919 |
| Marital status (Divorced or widowed vs Single) | −0.03 (−1.50, 1.44) | 0.971 |
| Education level (College or undergraduate vs High school or below) | −0.29 (−0.83, 0.25) | 0.286 |
| Education level (Postgraduate vs High school or below) | −0.49 (−1.16, 0.18) | 0.154 |
| BMI (kg/m2) | 0.04 (−0.01, 0.08) | 0.127 |
| Model 4 (Model 3 + Family history) |  |  |
| O3 (Q2 vs Q1) | 2.50 (1.83, 3.16) * | <0.001 |
| O3 (Q3 vs Q1) | 2.31 (1.51, 3.10) * | <0.001 |
| O3 (Q4 vs Q1) | 2.48 (1.79, 3.16) * | <0.001 |
| Age(years) | 0.07 (0.05, 0.09) * | <0.001 |
| Sex (Male vs Female) | −0.66 (−1.00, −0.32) * | <0.001 |
| Marital status (In a current marriage vs Single) | 0.01 (−0.45, 0.47) | 0.960 |
| Marital status (Divorced or widowed vs Single) | −0.06 (−1.53, 1.41) | 0.935 |
| Education level (College or undergraduate vs High school or below) | −0.32 (−0.86, 0.22) | 0.242 |
| Education level (Postgraduate vs High school or below) | −0.52 (−1.19, 0.15) | 0.129 |
| BMI (kg/m2) | 0.04 (−0.01, 0.08) | 0.148 |
| Family history of hypertension (Positive vs Negative) | 0.34 (0.01, 0.67) * | 0.041 |
| Family history of hypertension (Unknown vs Negative) | 0.12 (−0.56, 0.79) | 0.736 |
| Model 5 (Model 4 + Indoor air pollution + Lifestyle factors) |  |  |
| O3 (Q2 vs Q1) | 2.44 (1.74, 3.15) * | <0.001 |
| O3 (Q3 vs Q1) | 2.29 (1.46, 3.11) * | <0.001 |
| O3 (Q4 vs Q1) | 2.47 (1.74, 3.20) * | <0.001 |
| Age (years) | 0.06 (0.04, 0.08) * | <0.001 |
| Sex (Male vs Female) | −0.45 (−0.87, −0.03) * | 0.034 |
| Marital status (In a current marriage vs Single) | 0.19 (−0.32, 0.69) | 0.465 |
| Marital status (Divorced or widowed vs Single) | −0.08 (−1.68, 1.51) | 0.917 |
| Education level (College or undergraduate vs High school or below) | −0.45 (−1.01, 0.12) | 0.122 |
| Education level (Postgraduate vs High school or below) | −0.56 (−1.28, 0.15) | 0.121 |
| BMI (kg/m2) | 0.04 (−0.02, 0.09) | 0.174 |
| Family history of hypertension (Positive vs Negative) | 0.40 (0.04, 0.75) * | 0.028 |
| Family history of hypertension (Unknown vs Negative) | 0.18 (−0.53, 0.89) | 0.614 |
| Daily cooking time (0–1 hour vs 0 hours) | −0.06 (−0.46, 0.34) | 0.778 |
| Daily cooking time (>1 hour vs 0 hours) | −0.25 (−0.74, 0.23) | 0.309 |
| Night sleep duration (<7 hours/day vs 7–8 hours/day) | 0.29 (−0.35, 0.92) | 0.378 |
| Night sleep duration (>8 hours/day vs 7–8 hours/day) | −0.34 (−0.80, 0.12) | 0.149 |
| Smoking (Current vs Never) | −0.28 (−0.80, 0.24) | 0.289 |
| Smoking (Former vs Never) | −1.11 (−2.21, −0.02) * | 0.047 |
| Alcohol drinking (Current vs Never) | 0.10 (−0.36, 0.55) | 0.671 |
| Alcohol drinking (Former vs Never) | 0.69 (−1.02, 2.39) | 0.430 |
| Physical exercise (Yes vs No) | −0.19 (−0.56, 0.18) | 0.314 |
| Model 6 (Model 5 + Personal protective measures against air pollution) |  |  |
| O3 (Q2 vs Q1) | 2.47 (1.76, 3.17) * | <0.001 |
| O3 (Q3 vs Q1) | 2.31 (1.48, 3.14) * | <0.001 |
| O3 (Q4 vs Q1) | 2.48 (1.74, 3.21) * | <0.001 |
| Age (years) | 0.06 (0.04, 0.08) * | <0.001 |
| Sex (Male vs Female) | −0.49 (−0.91, −0.07) * | 0.023 |
| Marital status (In a current marriage vs Single) | 0.22 (−0.29, 0.72) | 0.399 |
| Marital status (Divorced or widowed vs Single) | −0.06 (−1.65, 1.54) | 0.945 |
| Education level (College or undergraduate vs High school or below) | −0.43 (−1.00, 0.13) | 0.133 |
| Education level (Postgraduate vs High school or below) | −0.54 (−1.26, 0.17) | 0.138 |
| BMI (kg/m2) | 0.03 (−0.02, 0.09) | 0.186 |
| Family history of hypertension (Positive vs Negative) | 0.40 (0.05, 0.75) * | 0.026 |
| Family history of hypertension (Unknown vs Negative) | 0.16 (−0.55, 0.87) | 0.665 |
| Daily cooking time (0–1 hour vs 0 hours) | −0.04 (−0.44, 0.36) | 0.840 |
| Daily cooking time (>1 hour vs 0 hours) | −0.22 (−0.71, 0.27) | 0.373 |
| Night sleep duration (<7 hours/day vs 7–8 hours/day) | 0.28 (−0.36, 0.92) | 0.391 |
| Night sleep duration (>8 hours/day vs 7–8 hours/day) | −0.34 (−0.80, 0.12) | 0.151 |
| Smoking (Current vs Never) | −0.30 (−0.82, 0.23) | 0.267 |
| Smoking (Former vs Never) | −1.12 (−2.22, −0.03) * | 0.045 |
| Alcohol drinking (Current vs Never) | 0.09 (−0.37, 0.54) | 0.704 |
| Alcohol drinking (Former vs Never) | 0.68 (−1.03, 2.38) | 0.437 |
| Physical exercise (Yes vs No) | −0.17 (−0.54, 0.20) | 0.379 |
| Mask usage (Yes vs No) | −0.30 (−0.68, 0.08) | 0.125 |
| Air purifier usage (Yes vs No) | −0.15 (−0.52, 0.23) | 0.441 |
| Model 7 (Model 6 + Biochemical indicators and chronic diseases) |  |  |
| O3 (Q2 vs Q1) | 2.12 (1.36, 2.87) * | <0.001 |
| O3 (Q3 vs Q1) | 2.03 (1.18, 2.87) * | <0.001 |
| O3 (Q4 vs Q1) | 2.14 (1.38, 2.90) * | <0.001 |
| Age (years) | 0.05 (0.03, 0.07) * | <0.001 |
| Sex (Male vs Female) | −0.52 (−0.97, −0.08) * | 0.020 |
| Marital status (In a current marriage vs Single) | 0.38 (−0.15, 0.90) | 0.160 |
| Marital status (Divorced or widowed vs Single) | 0.01 (−1.62, 1.65) | 0.988 |
| Education level (College or undergraduate vs High school or below) | −0.40 (−0.98, 0.18) | 0.173 |
| Education level (Postgraduate vs High school or below) | −0.50 (−1.23, 0.23) | 0.180 |
| BMI (kg/m2) | 0.01 (−0.05, 0.06) | 0.783 |
| Family history of hypertension (Positive vs Negative) | 0.39 (0.03, 0.75) * | 0.032 |
| Family history of hypertension (Unknown vs Negative) | 0.14 (−0.59, 0.88) | 0.698 |
| Daily cooking time (0–1 hour vs 0 hours) | 0.00 (−0.41, 0.41) | 0.991 |
| Daily cooking time (>1 hour vs 0 hours) | −0.20 (−0.70, 0.30) | 0.437 |
| Night sleep duration (<7 hours/day vs 7–8 hours/day) | 0.40 (−0.25, 1.05) | 0.229 |
| Night sleep duration (>8 hours/day vs 7–8 hours/day) | −0.30 (−0.78, 0.17) | 0.214 |
| Smoking (Current vs Never) | −0.35 (−0.88, 0.19) | 0.202 |
| Smoking (Former vs Never) | −1.04 (−2.16, 0.08) | 0.068 |
| Alcohol drinking (Current vs Never) | 0.07 (−0.40, 0.53) | 0.774 |
| Alcohol drinking (Former vs Never) | 0.45 (−1.28, 2.18) | 0.611 |
| Physical exercise (Yes vs No) | −0.12 (−0.50, 0.25) | 0.525 |
| Mask usage (Yes vs No) | −0.33 (−0.72, 0.06) | 0.100 |
| Air purifier usage (Yes vs No) | −0.16 (−0.54, 0.22) | 0.409 |
| FBG (mmol/L) | 0.14 (−0.05, 0.32) | 0.141 |
| TG (mmol/L) | −0.04 (−0.26, 0.18) | 0.741 |
| TC (mmol/L) | 0.22 (−0.31, 0.76) | 0.409 |
| LDL-C (mmol/L) | −0.10 (−0.68, 0.49) | 0.752 |
| HDL-C (mmol/L) | −0.29 (−1.10, 0.51) | 0.475 |
| CHD (Yes vs No) | 1.49 (−0.73, 3.71) | 0.187 |
| Cancer (Yes vs No) | −2.23 (−4.71, 0.26) | 0.079 |

Note: CI, confidence interval; O3, ozone; BMI, body mass index; FBG, fasting blood glucose; TG, triglyceride; TC, total cholesterol; LDL-C, low-density lipoprotein cholesterol; HDL-C, high-density lipoprotein cholesterol; CHD, coronary heart disease; vs, versus; Q1–Q4, the first to the fourth quartile groups of O3 exposure concentrations.

a represents the average increase in the outcomes compared to Q1.

* P-value < 0.05.

**Table S5** Relationship between long-term O3 exposure concentrations and MAP derived from the nested mixed-effects linear models.

| **Model** | **(95% CI)** | **P-value** |
| --- | --- | --- |
| Model 1 |  |  |
| O3 (Q2 vs Q1) | 1.95 (1.40, 2.50) * | <0.001 |
| O3 (Q3 vs Q1) | 1.46 (0.72, 2.19) * | <0.001 |
| O3 (Q4 vs Q1) | 1.60 (0.98, 2.22) * | <0.001 |
| Model 2 (Model 1 + Sociodemographic characteristics) |  |  |
| O3 (Q2 vs Q1) | 1.90 (1.35, 2.45) * | <0.001 |
| O3 (Q3 vs Q1) | 1.45 (0.72, 2.18) * | <0.001 |
| O3 (Q4 vs Q1) | 1.60 (0.98, 2.22) * | <0.001 |
| Age (years) | 0.04 (0.03, 0.06) * | <0.001 |
| Sex (Male vs Female) | 0.63 (0.36, 0.90) * | <0.001 |
| Marital status (In a current marriage vs Single) | 0.32 (−0.07, 0.70) | 0.106 |
| Marital status (Divorced or widowed vs Single) | 0.34 (−0.88, 1.57) | 0.584 |
| Education level (College or undergraduate vs High school or below) | −0.28 (−0.73, 0.17) | 0.223 |
| Education level (Postgraduate vs High school or below) | −0.54 (−1.10, 0.01) | 0.056 |
| Model 3 (Model 2 + BMI) |  |  |
| O3 (Q2 vs Q1) | 1.87 (1.31, 2.42) * | <0.001 |
| O3 (Q3 vs Q1) | 1.38 (0.64, 2.11) * | <0.001 |
| O3 (Q4 vs Q1) | 1.54 (0.92, 2.16) * | <0.001 |
| Age (years) | 0.04 (0.03, 0.06) * | <0.001 |
| Sex (Male vs Female) | 0.48 (0.20, 0.77) * | <0.001 |
| Marital status (In a current marriage vs Single) | 0.30 (−0.09, 0.68) | 0.132 |
| Marital status (Divorced or widowed vs Single) | 0.41 (−0.82, 1.65) | 0.511 |
| Education level (College or undergraduate vs High school or below) | −0.28 (−0.73, 0.17) | 0.230 |
| Education level (Postgraduate vs High school or below) | −0.56 (−1.11, 0.00) | 0.051 |
| BMI (kg/m2) | 0.07 (0.03, 0.11) * | <0.001 |
| Model 4 (Model 3 + Family history) |  |  |
| O3 (Q2 vs Q1) | 1.86 (1.30, 2.41) * | <0.001 |
| O3 (Q3 vs Q1) | 1.38 (0.64, 2.12) * | <0.001 |
| O3 (Q4 vs Q1) | 1.55 (0.92, 2.17) * | <0.001 |
| Age(years) | 0.04 (0.03, 0.06) * | <0.001 |
| Sex (Male vs Female) | 0.50 (0.22, 0.79) * | <0.001 |
| Marital status (In a current marriage vs Single) | 0.29 (−0.10, 0.67) | 0.144 |
| Marital status (Divorced or widowed vs Single) | 0.40 (−0.84, 1.63) | 0.529 |
| Education level (College or undergraduate vs High school or below) | −0.30 (−0.75, 0.15) | 0.197 |
| Education level (Postgraduate vs High school or below) | −0.58 (−1.14, −0.02) * | 0.042 |
| BMI (kg/m2) | 0.07 (0.03, 0.11) * | <0.001 |
| Family history of hypertension (Positive vs Negative) | 0.24 (−0.04, 0.51) | 0.094 |
| Family history of hypertension (Unknown vs Negative) | −0.12 (−0.69, 0.44) | 0.666 |
| Model 5 (Model 4 + Indoor air pollution + Lifestyle factors) |  |  |
| O3 (Q2 vs Q1) | 1.81 (1.23, 2.40) * | <0.001 |
| O3 (Q3 vs Q1) | 1.39 (0.61, 2.17) * | <0.001 |
| O3 (Q4 vs Q1) | 1.46 (0.79, 2.12) * | <0.001 |
| Age (years) | 0.04 (0.02, 0.06) * | <0.001 |
| Sex (Male vs Female) | 0.63 (0.28, 0.98) * | <0.001 |
| Marital status (In a current marriage vs Single) | 0.33 (−0.10, 0.75) | 0.133 |
| Marital status (Divorced or widowed vs Single) | −0.11 (−1.45, 1.23) | 0.875 |
| Education level (College or undergraduate vs High school or below) | −0.40 (−0.87, 0.08) | 0.101 |
| Education level (Postgraduate vs High school or below) | −0.74 (−1.34, −0.15) * | 0.014 |
| BMI (kg/m2) | 0.05 (0.01, 0.09) * | 0.023 |
| Family history of hypertension (Positive vs Negative) | 0.27 (−0.02, 0.57) | 0.070 |
| Family history of hypertension (Unknown vs Negative) | −0.14 (−0.74, 0.46) | 0.641 |
| Daily cooking time (0–1 hour vs 0 hours) | −0.03 (−0.37, 0.31) | 0.854 |
| Daily cooking time (>1 hour vs 0 hours) | 0.08 (−0.34, 0.49) | 0.718 |
| Night sleep duration (<7 hours/day vs 7–8 hours/day) | −0.04 (−0.58, 0.50) | 0.883 |
| Night sleep duration (>8 hours/day vs 7–8 hours/day) | 0.22 (−0.17, 0.62) | 0.259 |
| Smoking (Current vs Never) | −0.25 (−0.69, 0.19) | 0.266 |
| Smoking (Former vs Never) | −0.81 (−1.73, 0.12) | 0.088 |
| Alcohol drinking (Current vs Never) | 0.26 (−0.12, 0.64) | 0.185 |
| Alcohol drinking (Former vs Never) | 0.55 (−0.89, 1.98) | 0.457 |
| Physical exercise (Yes vs No) | −0.22 (−0.53, 0.10) | 0.173 |
| Model 6 (Model 5 + Personal protective measures against air pollution) |  |  |
| O3 (Q2 vs Q1) | 1.81 (1.22, 2.40) * | <0.001 |
| O3 (Q3 vs Q1) | 1.36 (0.58, 2.14) * | <0.001 |
| O3 (Q4 vs Q1) | 1.43 (0.76, 2.09) * | <0.001 |
| Age (years) | 0.04 (0.02, 0.06) * | <0.001 |
| Sex (Male vs Female) | 0.60 (0.24, 0.95) * | <0.001 |
| Marital status (In a current marriage vs Single) | 0.37 (−0.05, 0.80) | 0.086 |
| Marital status (Divorced or widowed vs Single) | −0.06 (−1.41, 1.28) | 0.927 |
| Education level (College or undergraduate vs High school or below) | −0.37 (−0.84, 0.11) | 0.131 |
| Education level (Postgraduate vs High school or below) | −0.69 (−1.29, −0.09) * | 0.023 |
| BMI (kg/m2) | 0.05 (0.01, 0.09) * | 0.025 |
| Family history of hypertension (Positive vs Negative) | 0.29 (−0.01, 0.59) | 0.056 |
| Family history of hypertension (Unknown vs Negative) | −0.16 (−0.76, 0.44) | 0.602 |
| Daily cooking time (0–1 hour vs 0 hours) | −0.01 (−0.35, 0.33) | 0.947 |
| Daily cooking time (>1 hour vs 0 hours) | 0.11 (−0.30, 0.52) | 0.607 |
| Night sleep duration (<7 hours/day vs 7–8 hours/day) | −0.05 (−0.58, 0.49) | 0.867 |
| Night sleep duration (>8 hours/day vs 7–8 hours/day) | 0.23 (−0.16, 0.62) | 0.252 |
| Smoking (Current vs Never) | −0.25 (−0.69, 0.19) | 0.263 |
| Smoking (Former vs Never) | −0.82 (−1.74, 0.11) | 0.083 |
| Alcohol drinking (Current vs Never) | 0.26 (−0.12, 0.64) | 0.186 |
| Alcohol drinking (Former vs Never) | 0.55 (−0.89, 1.98) | 0.457 |
| Physical exercise (Yes vs No) | −0.20 (−0.51, 0.12) | 0.222 |
| Mask usage (Yes vs No) | −0.14 (−0.46, 0.18) | 0.382 |
| Air purifier usage (Yes vs No) | −0.31 (−0.63, 0.01) | 0.058 |
| Model 7 (Model 6 + Biochemical indicators and chronic diseases) |  |  |
| O3 (Q2 vs Q1) | 1.39 (0.76, 2.02) * | <0.001 |
| O3 (Q3 vs Q1) | 1.04 (0.24, 1.84) * | 0.011 |
| O3 (Q4 vs Q1) | 1.12 (0.43, 1.82) * | 0.002 |
| Age (years) | 0.04 (0.02, 0.06) * | <0.001 |
| Sex (Male vs Female) | 0.48 (0.11, 0.85) * | 0.011 |
| Marital status (In a current marriage vs Single) | 0.41 (−0.04, 0.85) | 0.071 |
| Marital status (Divorced or widowed vs Single) | 0.18 (−1.20, 1.56) | 0.795 |
| Education level (College or undergraduate vs High school or below) | −0.21 (−0.70, 0.28) | 0.398 |
| Education level (Postgraduate vs High school or below) | −0.55 (−1.17, 0.06) | 0.076 |
| BMI (kg/m2) | 0.02 (−0.02, 0.07) | 0.328 |
| Family history of hypertension (Positive vs Negative) | 0.29 (−0.02, 0.59) | 0.063 |
| Family history of hypertension (Unknown vs Negative) | −0.08 (−0.69, 0.54) | 0.811 |
| Daily cooking time (0–1 hour vs 0 hours) | −0.04 (−0.39, 0.31) | 0.835 |
| Daily cooking time (>1 hour vs 0 hours) | 0.06 (−0.36, 0.49) | 0.767 |
| Night sleep duration (<7 hours/day vs 7–8 hours/day) | 0.02 (−0.53, 0.57) | 0.947 |
| Night sleep duration (>8 hours/day vs 7–8 hours/day) | 0.21 (−0.19, 0.61) | 0.303 |
| Smoking (Current vs Never) | −0.18 (−0.63, 0.27) | 0.439 |
| Smoking (Former vs Never) | −0.73 (−1.68, 0.21) | 0.126 |
| Alcohol drinking (Current vs Never) | 0.29 (−0.10, 0.68) | 0.149 |
| Alcohol drinking (Former vs Never) | 0.41 (−1.05, 1.87) | 0.580 |
| Physical exercise (Yes vs No) | −0.16 (−0.48, 0.16) | 0.327 |
| Mask usage (Yes vs No) | −0.12 (−0.45, 0.21) | 0.479 |
| Air purifier usage (Yes vs No) | −0.27 (−0.59, 0.05) | 0.100 |
| FBG (mmol/L) | −0.07 (−0.22, 0.08) | 0.362 |
| TG (mmol/L) | −0.02 (−0.21, 0.16) | 0.796 |
| TC (mmol/L) | −0.05 (−0.50, 0.39) | 0.810 |
| LDL-C (mmol/L) | 0.12 (−0.37, 0.61) | 0.639 |
| HDL-C (mmol/L) | −0.75 (−1.43, −0.08) * | 0.029 |
| CHD (Yes vs No) | 0.82 (−1.05, 2.69) | 0.392 |
| Cancer (Yes vs No) | −0.79 (−2.88, 1.31) | 0.461 |

Note: CI, confidence interval; O3, ozone; BMI, body mass index; FBG, fasting blood glucose; TG, triglyceride; TC, total cholesterol; LDL-C, low-density lipoprotein cholesterol; HDL-C, high-density lipoprotein cholesterol; CHD, coronary heart disease; vs, versus; Q1–Q4, the first to the fourth quartile groups of O3 exposure concentrations.

a represents the average increase in the outcomes compared to Q1.

* P-value < 0.05.

**Table S6** *P* value for interaction terms of subgroup in the full models based on five outcomes.

| **Interaction items** | | **Hypertension** | **DBP** | **SBP** | **PP** | **MAP** |
| --- | --- | --- | --- | --- | --- | --- |
| Sex | Q1 | – | – | – | – | – |
| Q2 | 0.047 * | <0.001 * | 0.056 | 0.191 | <0.001 * |
| Q3 | 0.596 | 0.728 | 0.487 | 0.227 | 0.932 |
| Q4 | 0.595 | 0.147 | 0.933 | 0.241 | 0.307 |
| Age | Q1 | – | – | – | – | – |
| Q2 | 0.056 | 0.244 | 0.010 * | 0.038 * | 0.049 * |
| Q3 | 0.246 | 0.862 | 0.018 * | 0.008 * | 0.217 |
| Q4 | 0.692 | 0.945 | 0.047 * | 0.018 * | 0.381 |
| BMI | Q1 | – | – | – | – | – |
| Q2 | 0.026 * | 0.542 | 0.261 | 0.454 | 0.343 |
| Q3 | 0.025 * | 0.093 | 0.515 | 0.578 | 0.158 |
| Q4 | 0.194 | 0.011 * | 0.438 | 0.270 | 0.040 * |

Note: DBP, diastolic blood pressure; SBP, systolic blood pressure; PP, pulse pressure; MAP, mean arterial pressure; BMI, body mass index; Q1–Q4, the first to the fourth quartile groups of O3 exposure concentrations.

* P-value < 0.05.

**Table S7** Results of the full nested mixed-effects model analysis after excluding 98 participants with self-reported hypertension.

| **Variables** | **HR/(95% CI)** | **P-value** |
| --- | --- | --- |
| Outcome of hypertension |  |  |
| O3 (Q2 vs Q1) | 1.79 (1.34, 2.40) * | <0.001 |
| O3 (Q3 vs Q1) | 2.11 (1.43, 3.11) * | <0.001 |
| O3 (Q4 vs Q1) | 3.60 (2.56, 5.07) * | <0.001 |
| Age (years) | 1.03 (1.02, 1.04) * | <0.001 |
| Sex (Male vs Female) | 1.85 (1.59, 2.16) * | <0.001 |
| Marital status (In a current marriage vs Single) | 0.80 (0.65, 0.99) * | 0.037 |
| Marital status (Divorced or widowed vs Single) | 0.49 (0.25, 0.99) * | 0.047 |
| Education level (College or undergraduate vs High school or below) | 0.84 (0.70, 1.01) | 0.064 |
| Education level (Postgraduate vs High school or below) | 0.71 (0.55, 0.92) * | 0.009 |
| BMI (kg/m2) | 1.09 (1.07, 1.11) * | <0.001 |
| Family history of hypertension (Positive vs Negative) | 1.17 (1.03, 1.32) * | 0.015 |
| Family history of hypertension (Unknown vs Negative) | 1.05 (0.80, 1.38) | 0.718 |
| Daily cooking time (0–1 hour vs 0 hours) | 0.94 (0.81, 1.10) | 0.448 |
| Daily cooking time (>1 hour vs 0 hours) | 0.93 (0.78, 1.10) | 0.392 |
| Night sleep duration (<7 hours/day vs 7–8 hours/day) | 0.86 (0.69, 1.06) | 0.155 |
| Night sleep duration (>8 hours/day vs 7–8 hours/day) | 0.98 (0.82, 1.17) | 0.818 |
| Smoking (Current vs Never) | 0.90 (0.77, 1.05) | 0.186 |
| Smoking (Former vs Never) | 1.10 (0.81, 1.49) | 0.556 |
| Alcohol drinking (Current vs Never) | 1.09 (0.95, 1.25) | 0.237 |
| Alcohol drinking (Former vs Never) | 0.92 (0.59, 1.44) | 0.720 |
| Physical exercise (Yes vs No) | 1.08 (0.95, 1.23) | 0.217 |
| Mask usage (Yes vs No) | 0.93 (0.81, 1.07) | 0.296 |
| Air purifier usage (Yes vs No) | 0.97 (0.84, 1.11) | 0.657 |
| FBG (mmol/L) | 1.05 (1.00, 1.09) * | 0.029 |
| TG (mmol/L) | 1.01 (0.95, 1.07) | 0.786 |
| TC (mmol/L) | 1.15 (0.99, 1.33) | 0.072 |
| LDL-C (mmol/L) | 0.98 (0.82, 1.16) | 0.804 |
| HDL-C (mmol/L) | 0.73 (0.56, 0.96) * | 0.026 |
| CHD (Yes vs No) | 0.83 (0.45, 1.53) | 0.544 |
| Cancer (Yes vs No) | 0.57 (0.18, 1.79) | 0.334 |
| Outcome of DBP |  |  |
| O3 (Q2 vs Q1) | 0.68 (0.03, 1.32) * | 0.040 |
| O3 (Q3 vs Q1) | 0.20 (−0.63, 1.03) | 0.634 |
| O3 (Q4 vs Q1) | 0.33 (−0.38, 1.04) | 0.360 |
| Age (years) | 0.02 (0.00, 0.04) * | 0.024 |
| Sex (Male vs Female) | 0.64 (0.27, 1.01) * | <0.001 |
| Marital status (In a current marriage vs Single) | 0.33 (−0.11, 0.77) | 0.141 |
| Marital status (Divorced or widowed vs Single) | 0.14 (−1.24, 1.51) | 0.846 |
| Education level (College or undergraduate vs High school or below) | −0.06 (−0.54, 0.43) | 0.816 |
| Education level (Postgraduate vs High school or below) | −0.39 (−1.00, 0.22) | 0.210 |
| BMI (kg/m2) | 0.02 (−0.03, 0.07) | 0.423 |
| Family history of hypertension (Positive vs Negative) | 0.16 (−0.14, 0.46) | 0.287 |
| Family history of hypertension (Unknown vs Negative) | −0.14 (−0.75, 0.47) | 0.658 |
| Daily cooking time (0–1 hour vs 0 hours) | −0.05 (−0.40, 0.29) | 0.766 |
| Daily cooking time (>1 hour vs 0 hours) | 0.09 (−0.33, 0.51) | 0.671 |
| Night sleep duration (<7 hours/day vs 7–8 hours/day) | −0.10 (−0.64, 0.44) | 0.718 |
| Night sleep duration (>8 hours/day vs 7–8 hours/day) | 0.30 (−0.10, 0.69) | 0.139 |
| Smoking (Current vs Never) | −0.02 (−0.46, 0.43) | 0.944 |
| Smoking (Former vs Never) | −0.35 (−1.29, 0.58) | 0.462 |
| Alcohol drinking (Current vs Never) | 0.25 (−0.14, 0.64) | 0.203 |
| Alcohol drinking (Former vs Never) | 0.24 (−1.20, 1.68) | 0.747 |
| Physical exercise (Yes vs No) | −0.08 (−0.40, 0.23) | 0.603 |
| Mask usage (Yes vs No) | 0.01 (−0.31, 0.34) | 0.929 |
| Air purifier usage (Yes vs No) | −0.25 (−0.57, 0.08) | 0.134 |
| FBG (mmol/L) | −0.11 (−0.26, 0.04) | 0.149 |
| TG (mmol/L) | −0.03 (−0.21, 0.16) | 0.780 |
| TC (mmol/L) | −0.07 (−0.52, 0.37) | 0.755 |
| LDL-C (mmol/L) | 0.07 (−0.42, 0.57) | 0.765 |
| HDL-C (mmol/L) | −0.71 (−1.38, −0.04) * | 0.037 |
| CHD (Yes vs No) | 0.33 (−1.52, 2.18) | 0.729 |
| Cancer (Yes vs No) | −0.02 (−2.09, 2.05) | 0.985 |
| Outcome of SBP |  |  |
| O3 (Q2 vs Q1) | 2.97 (2.08, 3.86) * | <0.001 |
| O3 (Q3 vs Q1) | 2.36 (1.23, 3.50) * | <0.001 |
| O3 (Q4 vs Q1) | 2.61 (1.64, 3.59) * | <0.001 |
| Age (years) | 0.07 (0.05, 0.10) * | <0.001 |
| Sex (Male vs Female) | 0.12 (−0.40, 0.64) | 0.649 |
| Marital status (In a current marriage vs Single) | 0.68 (0.06, 1.30) * | 0.031 |
| Marital status (Divorced or widowed vs Single) | 0.09 (−1.85, 2.04) | 0.925 |
| Education level (College or undergraduate vs High school or below) | −0.44 (−1.13, 0.24) | 0.203 |
| Education level (Postgraduate vs High school or below) | −0.87 (−1.74, −0.01) * | 0.046 |
| BMI (kg/m2) | 0.03 (−0.04, 0.10) | 0.383 |
| Family history of hypertension (Positive vs Negative) | 0.54 (0.12, 0.97) * | 0.012 |
| Family history of hypertension (Unknown vs Negative) | 0.05 (−0.82, 0.92) | 0.911 |
| Daily cooking time (0–1 hour vs 0 hours) | −0.03 (−0.52, 0.46) | 0.899 |
| Daily cooking time (>1 hour vs 0 hours) | −0.07 (−0.66, 0.53) | 0.822 |
| Night sleep duration (<7 hours/day vs 7–8 hours/day) | 0.28 (−0.50, 1.05) | 0.485 |
| Night sleep duration (>8 hours/day vs 7–8 hours/day) | 0.00 (−0.57, 0.56) | 0.988 |
| Smoking (Current vs Never) | −0.36 (−0.99, 0.27) | 0.260 |
| Smoking (Former vs Never) | −1.40 (−2.73, −0.08) * | 0.038 |
| Alcohol drinking (Current vs Never) | 0.33 (−0.22, 0.88) | 0.243 |
| Alcohol drinking (Former vs Never) | 0.70 (−1.35, 2.74) | 0.504 |
| Physical exercise (Yes vs No) | −0.22 (−0.67, 0.23) | 0.336 |
| Mask usage (Yes vs No) | −0.34 (−0.80, 0.12) | 0.150 |
| Air purifier usage (Yes vs No) | −0.41 (−0.86, 0.05) | 0.079 |
| FBG (mmol/L) | 0.05 (−0.17, 0.26) | 0.672 |
| TG (mmol/L) | −0.07 (−0.32, 0.19) | 0.612 |
| TC (mmol/L) | 0.20 (−0.42, 0.83) | 0.523 |
| LDL-C (mmol/L) | −0.08 (−0.78, 0.61) | 0.811 |
| HDL-C (mmol/L) | −1.03 (−1.98, −0.08) * | 0.034 |
| CHD (Yes vs No) | 1.89 (−0.73, 4.51) | 0.158 |
| Cancer (Yes vs No) | −2.25 (−5.18, 0.69) | 0.134 |
| Outcome of PP |  |  |
| O3 (Q2 vs Q1) | 2.19 (1.44, 2.95) * | <0.001 |
| O3 (Q3 vs Q1) | 2.00 (1.15, 2.86) * | <0.001 |
| O3 (Q4 vs Q1) | 2.17 (1.41, 2.93) * | <0.001 |
| Age (years) | 0.05 (0.03, 0.07) * | <0.001 |
| Sex (Male vs Female) | −0.53 (−0.97, −0.09) * | 0.019 |
| Marital status (In a current marriage vs Single) | 0.37 (−0.16, 0.89) | 0.167 |
| Marital status (Divorced or widowed vs Single) | 0.00 (−1.65, 1.65) | 1.000 |
| Education level (College or undergraduate vs High school or below) | −0.35 (−0.94, 0.23) | 0.232 |
| Education level (Postgraduate vs High school or below) | −0.46 (−1.19, 0.27) | 0.217 |
| BMI (kg/m2) | 0.01 (−0.05, 0.06) | 0.779 |
| Family history of hypertension (Positive vs Negative) | 0.39 (0.03, 0.76) * | 0.032 |
| Family history of hypertension (Unknown vs Negative) | 0.19 (−0.54, 0.93) | 0.603 |
| Daily cooking time (0–1 hour vs 0 hours) | 0.02 (−0.39, 0.43) | 0.920 |
| Daily cooking time (>1 hour vs 0 hours) | −0.17 (−0.67, 0.33) | 0.508 |
| Night sleep duration (<7 hours/day vs 7–8 hours/day) | 0.40 (−0.26, 1.05) | 0.235 |
| Night sleep duration (>8 hours/day vs 7–8 hours/day) | −0.31 (−0.79, 0.16) | 0.200 |
| Smoking (Current vs Never) | −0.35 (−0.88, 0.19) | 0.201 |
| Smoking (Former vs Never) | −1.05 (−2.17, 0.07) | 0.066 |
| Alcohol drinking (Current vs Never) | 0.07 (−0.39, 0.54) | 0.753 |
| Alcohol drinking (Former vs Never) | 0.46 (−1.26, 2.19) | 0.599 |
| Physical exercise (Yes vs No) | −0.13 (−0.50, 0.25) | 0.504 |
| Mask usage (Yes vs No) | −0.33 (−0.72, 0.06) | 0.093 |
| Air purifier usage (Yes vs No) | −0.16 (−0.54, 0.22) | 0.411 |
| FBG (mmol/L) | 0.16 (−0.02, 0.34) | 0.086 |
| TG (mmol/L) | −0.04 (−0.26, 0.18) | 0.735 |
| TC (mmol/L) | 0.25 (−0.28, 0.78) | 0.361 |
| LDL-C (mmol/L) | −0.13 (−0.72, 0.46) | 0.672 |
| HDL-C (mmol/L) | −0.32 (−1.12, 0.49) | 0.438 |
| CHD (Yes vs No) | 1.53 (−0.69, 3.74) | 0.177 |
| Cancer (Yes vs No) | −2.20 (−4.68, 0.28) | 0.082 |
| Outcome of MAP |  |  |
| O3 (Q2 vs Q1) | 1.43 (0.80, 2.06) * | <0.001 |
| O3 (Q3 vs Q1) | 0.95 (0.15, 1.76) * | 0.021 |
| O3 (Q4 vs Q1) | 1.13 (0.44, 1.82) * | 0.001 |
| Age (years) | 0.04 (0.02, 0.06) * | <0.001 |
| Sex (Male vs Female) | 0.46 (0.09, 0.83) * | 0.016 |
| Marital status (In a current marriage vs Single) | 0.44 (0.00, 0.88) | 0.052 |
| Marital status (Divorced or widowed vs Single) | 0.12 (−1.27, 1.50) | 0.870 |
| Education level (College or undergraduate vs High school or below) | −0.19 (−0.68, 0.30) | 0.442 |
| Education level (Postgraduate vs High school or below) | −0.55 (−1.16, 0.07) | 0.081 |
| BMI (kg/m2) | 0.02 (−0.02, 0.07) | 0.357 |
| Family history of hypertension (Positive vs Negative) | 0.29 (−0.02, 0.59) | 0.065 |
| Family history of hypertension (Unknown vs Negative) | −0.08 (−0.69, 0.54) | 0.803 |
| Daily cooking time (0–1 hour vs 0 hours) | −0.04 (−0.40, 0.31) | 0.801 |
| Daily cooking time (>1 hour vs 0 hours) | 0.04 (−0.39, 0.46) | 0.865 |
| Night sleep duration (<7 hours/day vs 7–8 hours/day) | 0.02 (−0.53, 0.57) | 0.941 |
| Night sleep duration (>8 hours/day vs 7–8 hours/day) | 0.20 (−0.20, 0.60) | 0.329 |
| Smoking (Current vs Never) | −0.13 (−0.58, 0.32) | 0.560 |
| Smoking (Former vs Never) | −0.69 (−1.63, 0.26) | 0.154 |
| Alcohol drinking (Current vs Never) | 0.28 (−0.11, 0.67) | 0.158 |
| Alcohol drinking (Former vs Never) | 0.40 (−1.05, 1.86) | 0.588 |
| Physical exercise (Yes vs No) | −0.13 (−0.45, 0.19) | 0.420 |
| Mask usage (Yes vs No) | −0.10 (−0.43, 0.22) | 0.534 |
| Air purifier usage (Yes vs No) | −0.30 (−0.62, 0.03) | 0.072 |
| FBG (mmol/L) | −0.06 (−0.21, 0.09) | 0.433 |
| TG (mmol/L) | −0.03 (−0.22, 0.15) | 0.729 |
| TC (mmol/L) | −0.01 (−0.46, 0.43) | 0.953 |
| LDL-C (mmol/L) | 0.06 (−0.43, 0.55) | 0.804 |
| HDL-C (mmol/L) | −0.81 (−1.48, −0.13) * | 0.019 |
| CHD (Yes vs No) | 0.83 (−1.04, 2.70) | 0.383 |
| Cancer (Yes vs No) | −0.75 (−2.83, 1.34) | 0.483 |

Note: HR, hazard ratio; CI, confidence interval; O3, ozone; DBP, diastolic blood pressure; SBP, systolic blood pressure; PP, pulse pressure; MAP, mean arterial pressure; BMI, body mass index; FBG, fasting blood glucose; TG, triglyceride; TC, total cholesterol; LDL-C, low-density lipoprotein cholesterol; HDL-C, high-density lipoprotein cholesterol; CHD, coronary heart disease; vs, versus; Q1–Q4, the first to the fourth quartile groups of O3 exposure concentrations.

a represents the average increase in the outcomes compared to Q1.

* P-value < 0.05.

**Table S8** Results from the full nested mixed-effects model with diabetes and dyslipidemia replacing biochemical indicators.

| **Variables** | **HR/(95% CI)** | **P-value** |
| --- | --- | --- |
| Outcome of hypertension |  |  |
| O3 (Q2 vs Q1) | 1.73 (1.31, 2.29) * | <0.001 |
| O3 (Q3 vs Q1) | 2.10 (1.44, 3.04) * | <0.001 |
| O3 (Q4 vs Q1) | 3.41 (2.45, 4.74) * | <0.001 |
| Age (years) | 1.03 (1.03, 1.04) * | <0.001 |
| Sex (Male vs Female) | 1.93 (1.66, 2.23) * | <0.001 |
| Marital status (In a current marriage vs Single) | 0.83 (0.67, 1.01) | 0.064 |
| Marital status (Divorced or widowed vs Single) | 0.54 (0.29, 1.02) | 0.058 |
| Education level (College or undergraduate vs High school or below) | 0.84 (0.70, 0.99) * | 0.044 |
| Education level (Postgraduate vs High school or below) | 0.70 (0.54, 0.89) * | 0.004 |
| BMI (kg/m2) | 1.09 (1.07, 1.11) * | <0.001 |
| Family history of hypertension (Positive vs Negative) | 1.19 (1.05, 1.34) * | 0.005 |
| Family history of hypertension (Unknown vs Negative) | 1.07 (0.82, 1.41) | 0.614 |
| Daily cooking time (0–1 hour vs 0 hours) | 0.94 (0.81, 1.08) | 0.372 |
| Daily cooking time (>1 hour vs 0 hours) | 0.93 (0.78, 1.10) | 0.374 |
| Night sleep duration (<7 hours/day vs 7–8 hours/day) | 0.87 (0.70, 1.07) | 0.183 |
| Night sleep duration (>8 hours/day vs 7–8 hours/day) | 0.95 (0.80, 1.13) | 0.592 |
| Smoking (Current vs Never) | 0.91 (0.78, 1.06) | 0.223 |
| Smoking (Former vs Never) | 1.10 (0.82, 1.48) | 0.538 |
| Alcohol drinking (Current vs Never) | 1.06 (0.93, 1.22) | 0.371 |
| Alcohol drinking (Former vs Never) | 0.87 (0.56, 1.36) | 0.551 |
| Physical exercise (Yes vs No) | 1.07 (0.94, 1.21) | 0.290 |
| Mask usage (Yes vs No) | 0.96 (0.84, 1.09) | 0.533 |
| Air purifier usage (Yes vs No) | 0.97 (0.84, 1.11) | 0.638 |
| Diabetes (Yes vs No) | 1.14 (0.91, 1.42) | 0.265 |
| Dyslipidemia (Yes vs No) | 1.25 (1.10, 1.41) * | <0.001 |
| CHD (Yes vs No) | 0.77 (0.42, 1.41) | 0.397 |
| Cancer (Yes vs No) | 0.53 (0.17, 1.67) | 0.276 |
| Outcome of DBP |  |  |
| O3 (Q2 vs Q1) | 0.67 (0.03, 1.30) * | 0.041 |
| O3 (Q3 vs Q1) | 0.28 (−0.54, 1.10) | 0.508 |
| O3 (Q4 vs Q1) | 0.24 (−0.47, 0.94) | 0.507 |
| Age (years) | 0.01 (0.00, 0.03) | 0.107 |
| Sex (Male vs Female) | 0.72 (0.37, 1.08) * | <0.001 |
| Marital status (In a current marriage vs Single) | 0.30 (−0.14, 0.73) | 0.181 |
| Marital status (Divorced or widowed vs Single) | 0.18 (−1.18, 1.54) | 0.799 |
| Education level (College or undergraduate vs High school or below) | −0.14 (−0.62, 0.34) | 0.562 |
| Education level (Postgraduate vs High school or below) | −0.46 (−1.06, 0.14) | 0.135 |
| BMI (kg/m2) | 0.03 (−0.01, 0.08) | 0.156 |
| Family history of hypertension (Positive vs Negative) | 0.17 (−0.13, 0.47) | 0.276 |
| Family history of hypertension (Unknown vs Negative) | −0.11 (−0.71, 0.49) | 0.719 |
| Daily cooking time (0–1 hour vs 0 hours) | −0.07 (−0.41, 0.28) | 0.705 |
| Daily cooking time (>1 hour vs 0 hours) | 0.11 (−0.31, 0.53) | 0.606 |
| Night sleep duration (<7 hours/day vs 7–8 hours/day) | −0.10 (−0.64, 0.44) | 0.714 |
| Night sleep duration (>8 hours/day vs 7–8 hours/day) | 0.32 (−0.07, 0.71) | 0.110 |
| Smoking (Current vs Never) | −0.07 (−0.51, 0.38) | 0.770 |
| Smoking (Former vs Never) | −0.40 (−1.32, 0.52) | 0.394 |
| Alcohol drinking (Current vs Never) | 0.19 (−0.19, 0.57) | 0.331 |
| Alcohol drinking (Former vs Never) | 0.24 (−1.20, 1.67) | 0.748 |
| Physical exercise (Yes vs No) | −0.10 (−0.42, 0.21) | 0.516 |
| Mask usage (Yes vs No) | −0.03 (−0.35, 0.29) | 0.865 |
| Air purifier usage (Yes vs No) | −0.25 (−0.56, 0.07) | 0.131 |
| Diabetes (Yes vs No) | −0.37 (−1.14, 0.39) | 0.339 |
| Dyslipidemia (Yes vs No) | 0.36 (0.02, 0.71) * | 0.039 |
| CHD (Yes vs No) | 0.37 (−1.48, 2.22) | 0.692 |
| Cancer (Yes vs No) | −0.10 (−2.17, 1.97) | 0.924 |
| Outcome of SBP |  |  |
| O3 (Q2 vs Q1) | 2.90 (2.03, 3.78) * | <0.001 |
| O3 (Q3 vs Q1) | 2.56 (1.45, 3.68) * | <0.001 |
| O3 (Q4 vs Q1) | 2.60 (1.64, 3.57) * | <0.001 |
| Age (years) | 0.07 (0.04, 0.09) * | <0.001 |
| Sex (Male vs Female) | 0.26 (−0.24, 0.76) | 0.313 |
| Marital status (In a current marriage vs Single) | 0.62 (0.01, 1.24) * | 0.048 |
| Marital status (Divorced or widowed vs Single) | 0.11 (−1.82, 2.04) | 0.912 |
| Education level (College or undergraduate vs High school or below) | −0.58 (−1.25, 0.09) | 0.090 |
| Education level (Postgraduate vs High school or below) | −0.99 (−1.85, −0.14) * | 0.022 |
| BMI (kg/m2) | 0.05 (−0.01, 0.11) | 0.129 |
| Family history of hypertension (Positive vs Negative) | 0.55 (0.12, 0.97) * | 0.012 |
| Family history of hypertension (Unknown vs Negative) | 0.04 (−0.81, 0.90) | 0.919 |
| Daily cooking time (0–1 hour vs 0 hours) | −0.08 (−0.57, 0.41) | 0.747 |
| Daily cooking time (>1 hour vs 0 hours) | −0.07 (−0.66, 0.52) | 0.819 |
| Night sleep duration (<7 hours/day vs 7–8 hours/day) | 0.25 (−0.52, 1.02) | 0.522 |
| Night sleep duration (>8 hours/day vs 7–8 hours/day) | 0.04 (−0.52, 0.60) | 0.885 |
| Smoking (Current vs Never) | −0.44 (−1.07, 0.19) | 0.169 |
| Smoking (Former vs Never) | −1.51 (−2.82, −0.21) * | 0.023 |
| Alcohol drinking (Current vs Never) | 0.28 (−0.27, 0.82) | 0.319 |
| Alcohol drinking (Former vs Never) | 0.74 (−1.29, 2.77) | 0.474 |
| Physical exercise (Yes vs No) | −0.28 (−0.72, 0.17) | 0.221 |
| Mask usage (Yes vs No) | −0.37 (−0.82, 0.09) | 0.117 |
| Air purifier usage (Yes vs No) | −0.38 (−0.83, 0.08) | 0.104 |
| Diabetes (Yes vs No) | 0.32 (−0.76, 1.41) | 0.562 |
| Dyslipidemia (Yes vs No) | 0.52 (0.03, 1.01) * | 0.037 |
| CHD (Yes vs No) | 1.81 (−0.82, 4.43) | 0.177 |
| Cancer (Yes vs No) | −2.34 (−5.28, 0.60) | 0.118 |
| Outcome of PP |  |  |
| O3 (Q2 vs Q1) | 2.13 (1.38, 2.88) * | <0.001 |
| O3 (Q3 vs Q1) | 2.09 (1.24, 2.93) * | <0.001 |
| O3 (Q4 vs Q1) | 2.20 (1.45, 2.95) * | <0.001 |
| Age (years) | 0.05 (0.03, 0.08) * | <0.001 |
| Sex (Male vs Female) | −0.47 (−0.89, −0.04) * | 0.032 |
| Marital status (In a current marriage vs Single) | 0.34 (−0.18, 0.86) | 0.196 |
| Marital status (Divorced or widowed vs Single) | −0.02 (−1.65, 1.60) | 0.977 |
| Education level (College or undergraduate vs High school or below) | −0.41 (−0.98, 0.16) | 0.161 |
| Education level (Postgraduate vs High school or below) | −0.51 (−1.24, 0.21) | 0.164 |
| BMI (kg/m2) | 0.01 (−0.04, 0.07) | 0.598 |
| Family history of hypertension (Positive vs Negative) | 0.40 (0.04, 0.76) * | 0.029 |
| Family history of hypertension (Unknown vs Negative) | 0.16 (−0.56, 0.88) | 0.669 |
| Daily cooking time (0–1 hour vs 0 hours) | −0.01 (−0.42, 0.40) | 0.967 |
| Daily cooking time (>1 hour vs 0 hours) | −0.18 (−0.67, 0.32) | 0.478 |
| Night sleep duration (<7 hours/day vs 7–8 hours/day) | 0.37 (−0.28, 1.02) | 0.267 |
| Night sleep duration (>8 hours/day vs 7–8 hours/day) | −0.29 (−0.76, 0.18) | 0.230 |
| Smoking (Current vs Never) | −0.37 (−0.90, 0.15) | 0.166 |
| Smoking (Former vs Never) | −1.11 (−2.22, −0.01) * | 0.048 |
| Alcohol drinking (Current vs Never) | 0.08 (−0.38, 0.54) | 0.728 |
| Alcohol drinking (Former vs Never) | 0.51 (−1.20, 2.23) | 0.558 |
| Physical exercise (Yes vs No) | −0.16 (−0.54, 0.21) | 0.392 |
| Mask usage (Yes vs No) | −0.32 (−0.70, 0.07) | 0.106 |
| Air purifier usage (Yes vs No) | −0.13 (−0.51, 0.25) | 0.513 |
| Diabetes (Yes vs No) | 0.70 (−0.21, 1.62) | 0.133 |
| Dyslipidemia (Yes vs No) | 0.17 (−0.24, 0.58) | 0.422 |
| CHD (Yes vs No) | 1.40 (−0.82, 3.61) | 0.217 |
| Cancer (Yes vs No) | −2.23 (−4.71, 0.26) | 0.079 |
| Outcome of MAP |  |  |
| O3 (Q2 vs Q1) | 1.40 (0.78, 2.03) * | <0.001 |
| O3 (Q3 vs Q1) | 1.06 (0.26, 1.85) * | 0.009 |
| O3 (Q4 vs Q1) | 1.06 (0.37, 1.74) * | 0.003 |
| Age (years) | 0.03 (0.02, 0.05) * | <0.001 |
| Sex (Male vs Female) | 0.56 (0.20, 0.92) * | 0.002 |
| Marital status (In a current marriage vs Single) | 0.40 (−0.04, 0.83) | 0.077 |
| Marital status (Divorced or widowed vs Single) | 0.15 (−1.22, 1.52) | 0.833 |
| Education level (College or undergraduate vs High school or below) | −0.29 (−0.77, 0.19) | 0.230 |
| Education level (Postgraduate vs High school or below) | −0.63 (−1.24, −0.03) * | 0.040 |
| BMI (kg/m2) | 0.04 (−0.01, 0.08) | 0.100 |
| Family history of hypertension (Positive vs Negative) | 0.29 (−0.01, 0.59) | 0.060 |
| Family history of hypertension (Unknown vs Negative) | −0.06 (−0.67, 0.54) | 0.840 |
| Daily cooking time (0–1 hour vs 0 hours) | −0.07 (−0.42, 0.28) | 0.690 |
| Daily cooking time (>1 hour vs 0 hours) | 0.05 (−0.37, 0.47) | 0.819 |
| Night sleep duration (<7 hours/day vs 7–8 hours/day) | 0.01 (−0.53, 0.56) | 0.966 |
| Night sleep duration (>8 hours/day vs 7–8 hours/day) | 0.23 (−0.17, 0.62) | 0.259 |
| Smoking (Current vs Never) | −0.19 (−0.64, 0.25) | 0.396 |
| Smoking (Former vs Never) | −0.76 (−1.68, 0.17) | 0.111 |
| Alcohol drinking (Current vs Never) | 0.22 (−0.16, 0.61) | 0.257 |
| Alcohol drinking (Former vs Never) | 0.42 (−1.03, 1.86) | 0.573 |
| Physical exercise (Yes vs No) | −0.16 (−0.48, 0.15) | 0.311 |
| Mask usage (Yes vs No) | −0.14 (−0.47, 0.18) | 0.395 |
| Air purifier usage (Yes vs No) | −0.29 (−0.61, 0.03) | 0.080 |
| Diabetes (Yes vs No) | −0.15 (−0.92, 0.62) | 0.706 |
| Dyslipidemia (Yes vs No) | 0.42 (0.07, 0.76) * | 0.018 |
| CHD (Yes vs No) | 0.83 (−1.04, 2.70) | 0.382 |
| Cancer (Yes vs No) | −0.83 (−2.92, 1.26) | 0.435 |

Note: HR, hazard ratio; CI, confidence interval; O3, ozone; DBP, diastolic blood pressure; SBP, systolic blood pressure; PP, pulse pressure; MAP, mean arterial pressure; BMI, body mass index; CHD, coronary heart disease; Q1–Q4, the first to the fourth quartile groups of O3 exposure concentrations.

a represents the average increase in the outcomes compared to Q1.

* P-value < 0.05.


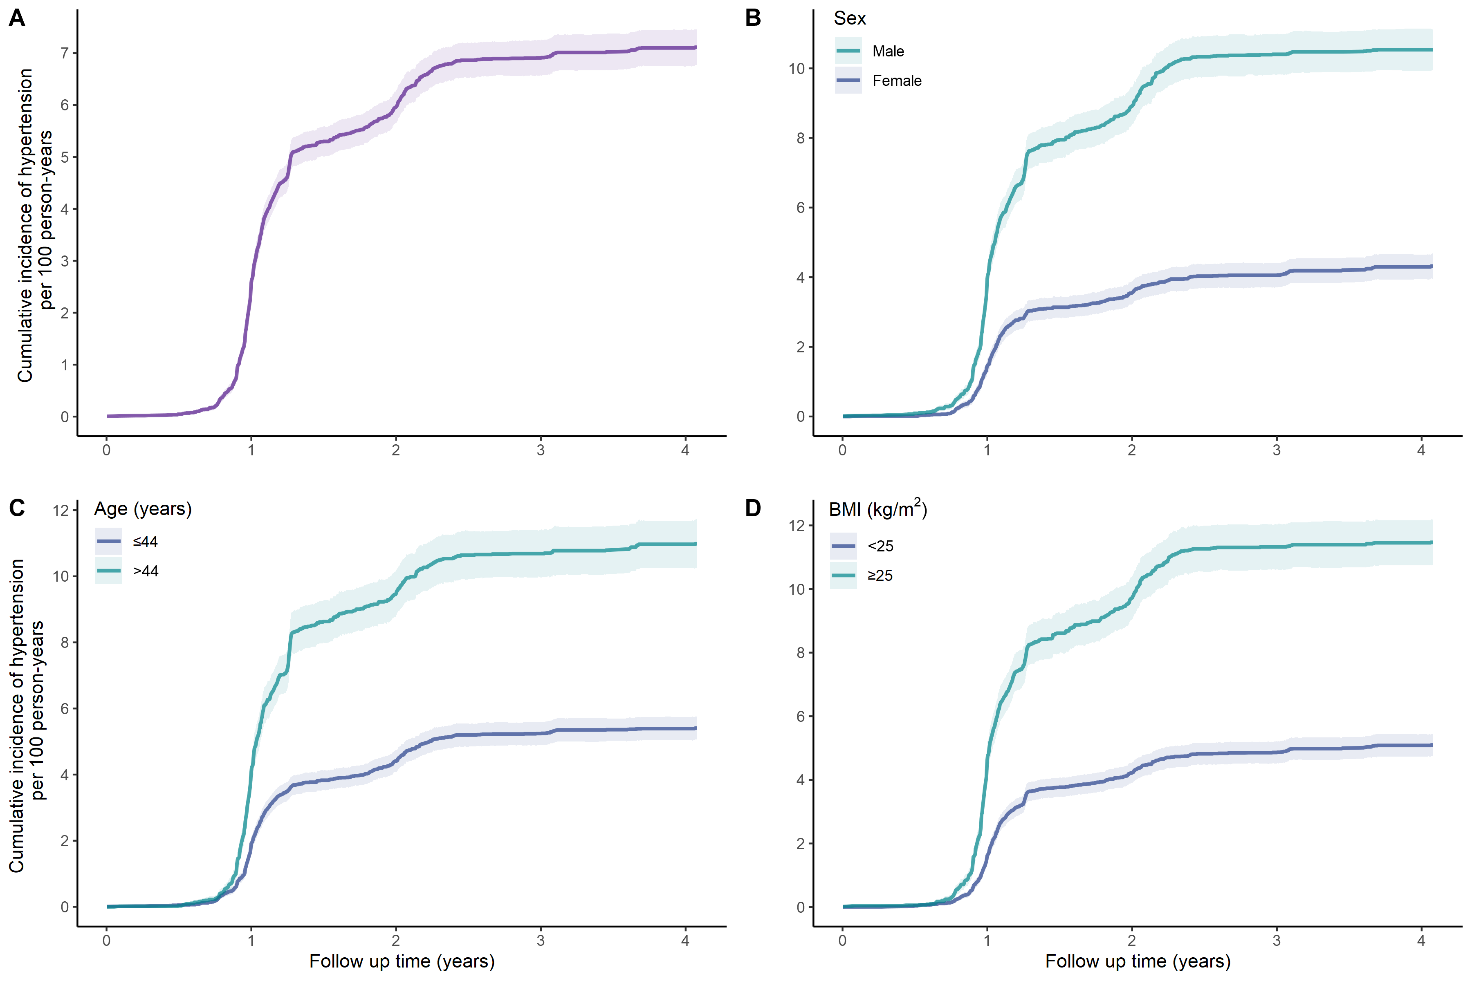


**Fig. S1.** Cumulative incidence of hypertension per 100 person-years during the follow-up period. Panel A shows the overall trend. Panels B, C and D introduce sex (male and female), age (≤44 and >44 years), and BMI (<25 and ≥25 kg/m2) as stratified variables, respectively. Shaded areas represent the bias-corrected 95% confidence intervals estimated by repeating the analysis with 1000 bootstrapped samples. Note: BMI, body mass index.


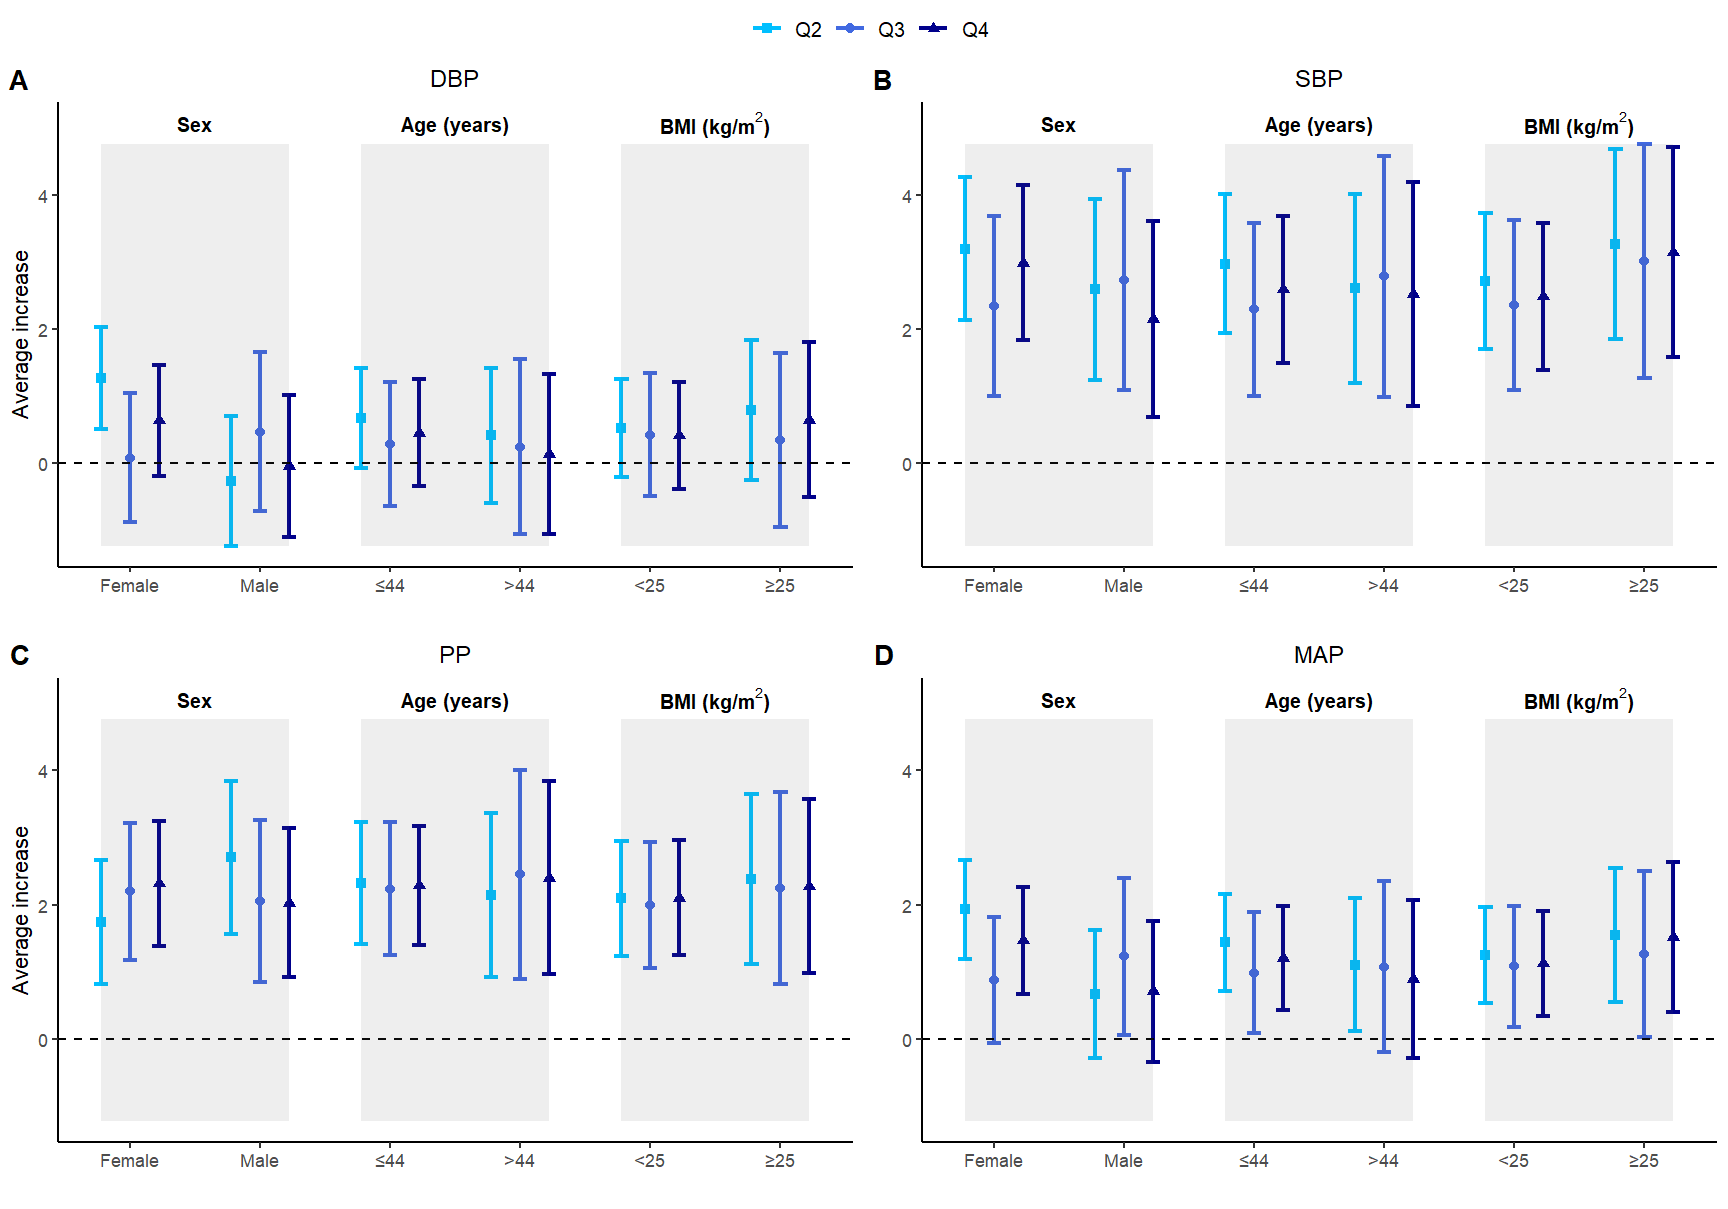


**Fig. S2.** Subgroup effects estimated according to sex (male and female), age (≤44 and >44 years), and BMI (<25 and ≥25 kg/m2) for four outcomes based on fully nested mixed-effects linear models. Note: DBP, diastolic blood pressure; SBP, systolic blood pressure; PP, pulse pressure; MAP, mean arterial pressure; BMI, body mass index; Q2–Q4, the second to the fourth quartile groups of O3 exposure concentrations.


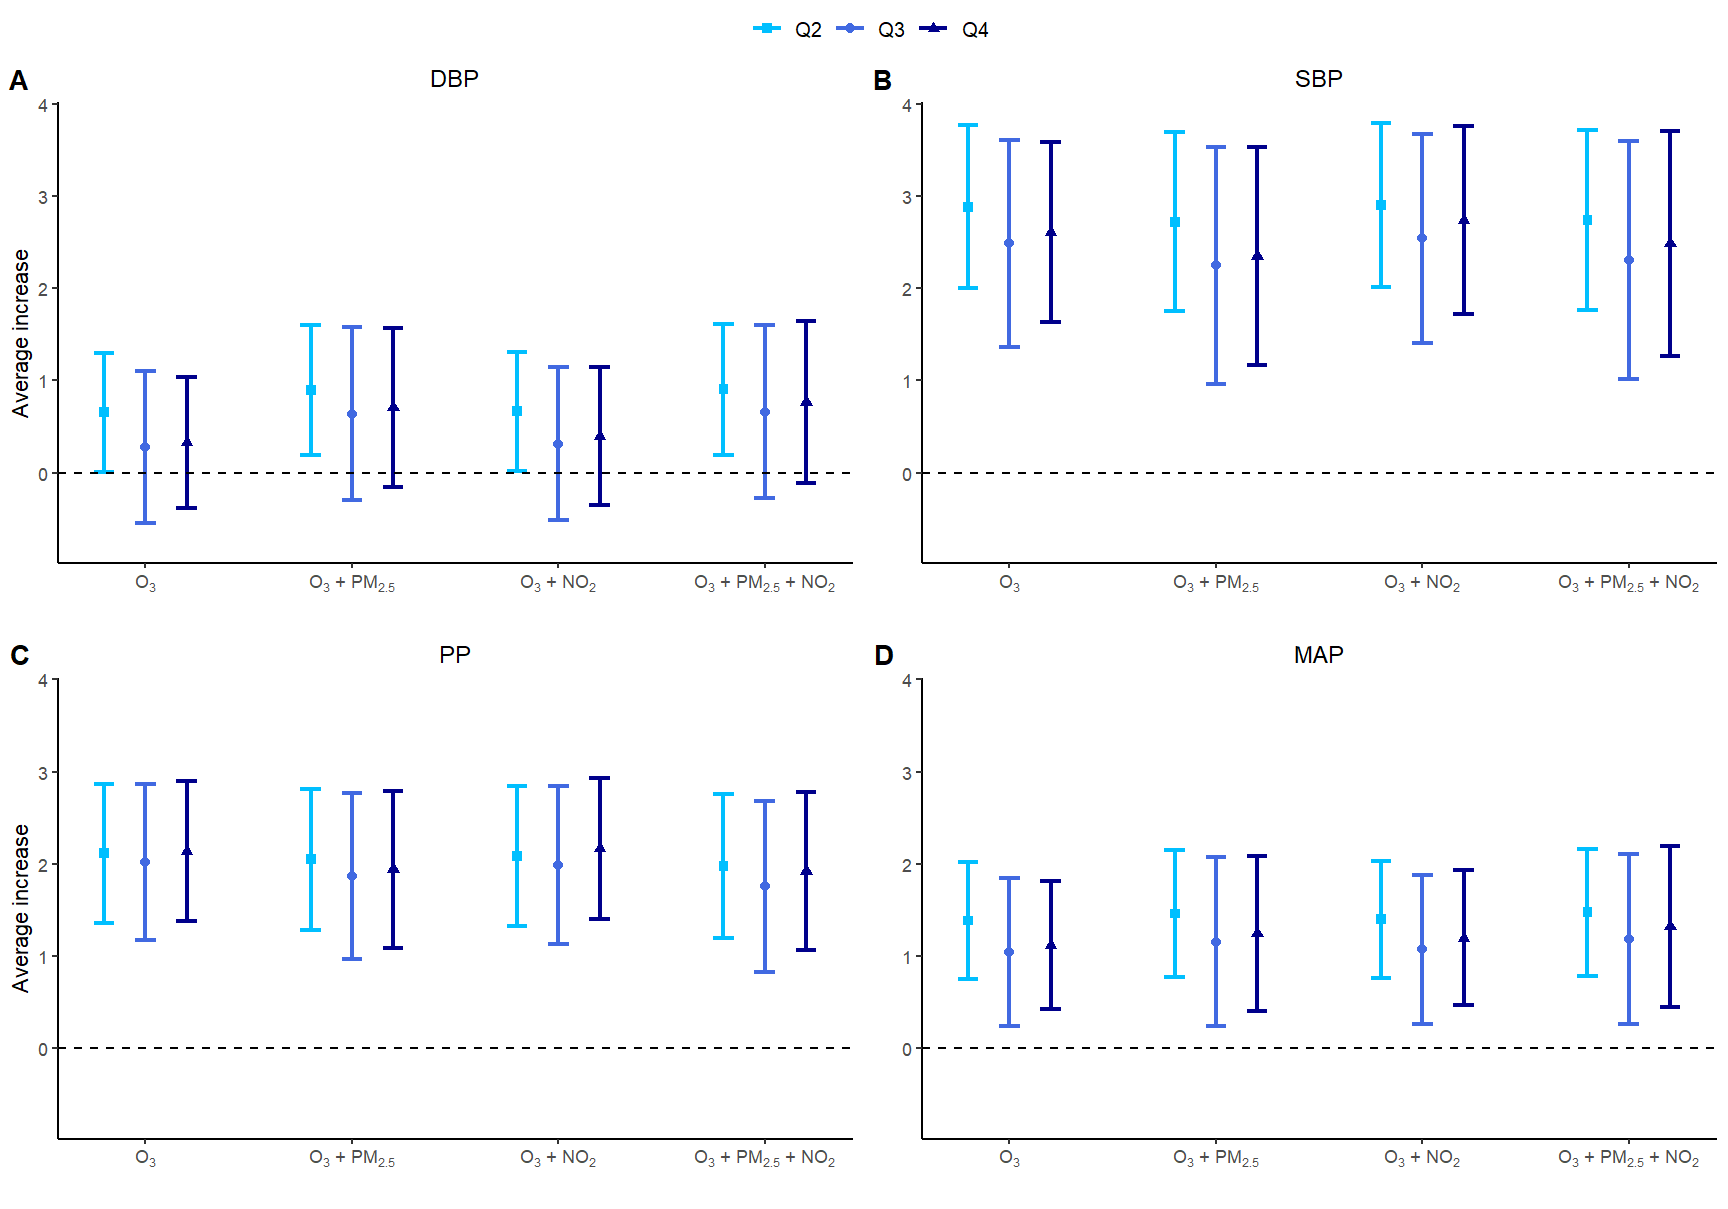


**Fig. S3.** Two-pollutant and three-pollutant models involving the pollutants of PM2.5 and NO2 for four outcomes based on fully nested mixed-effects linear models. Note: DBP, diastolic blood pressure; SBP, systolic blood pressure; PP, pulse pressure; MAP, mean arterial pressure; O3, ozone; PM2.5, particulate matter with aerodynamic diameter ≤2.5 μm; NO2, nitrogen dioxide; Q2–Q4, the second to the fourth quartile groups of O3 exposure concentrations.


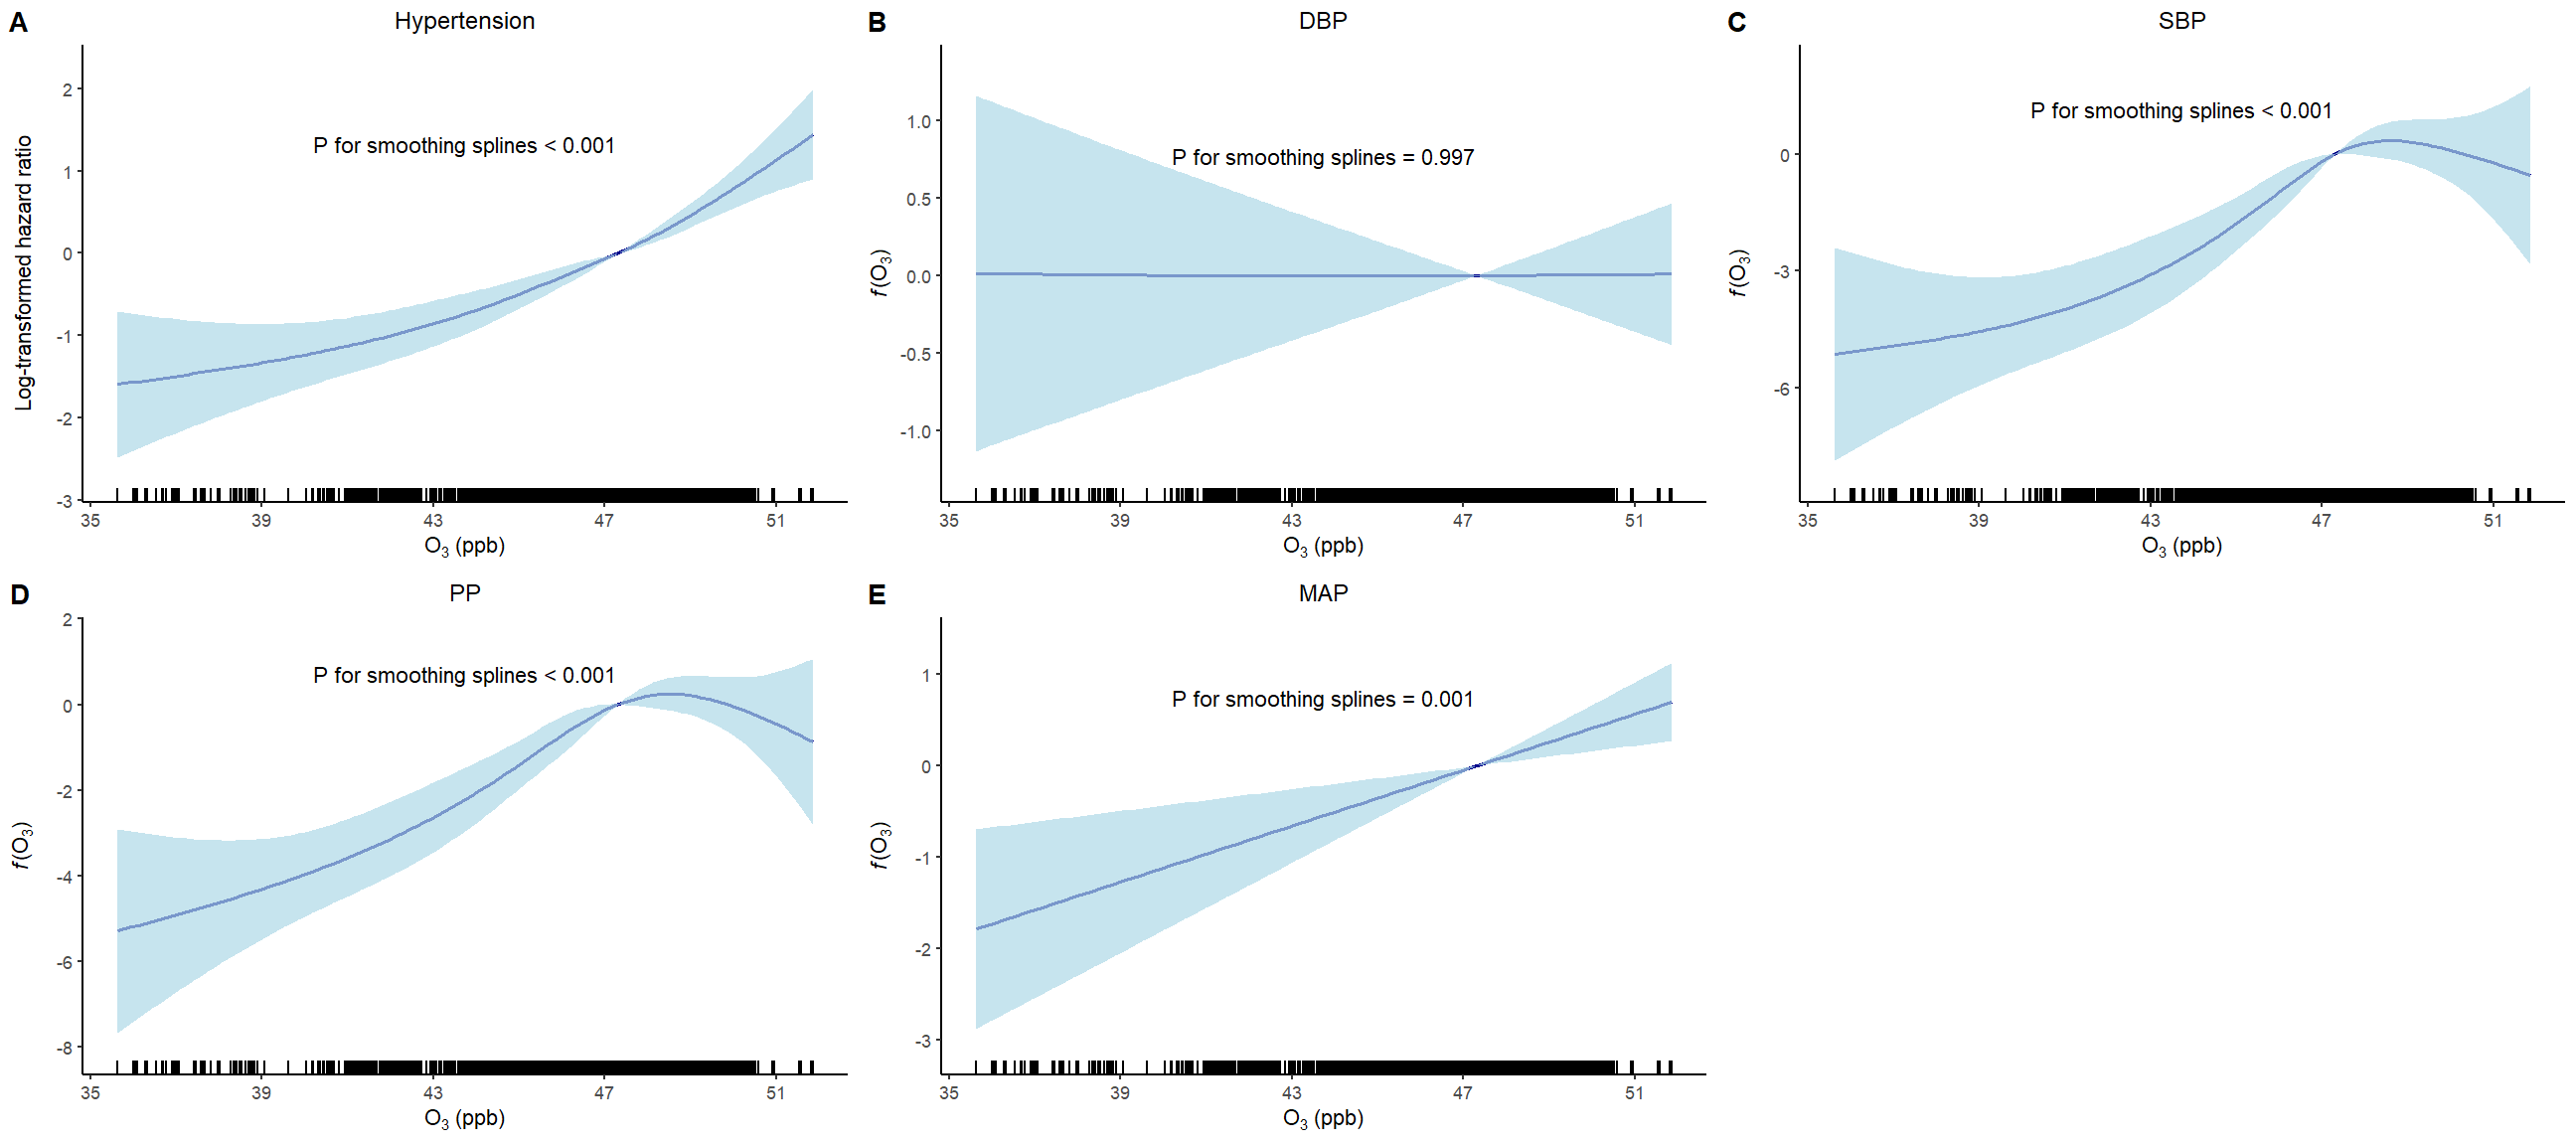


**Fig. S4.** Concentration-response curves of the association of 2-year average O3 exposure concentrations with hypertension, DBP, SBP, PP and MAP. Analyses are adjusted for age, sex, marital status, education level, BMI, family history of hypertension, daily cooking time, night sleep duration, smoking, mask usage, air purifier usage, FBG, TG, TC, LDL-C, HDL-C, CHD and cancer. Effects estimates are indicated by solid lines and 95% confidence intervals by shaded areas. Darker colors in the lower bars represent a higher sample clustering. Hazard ratios are on a logarithmic scale. Note: DBP, diastolic blood pressure; SBP, systolic blood pressure; PP, pulse pressure; MAP, mean arterial pressure; O3, ozone; ppb, parts per billion.


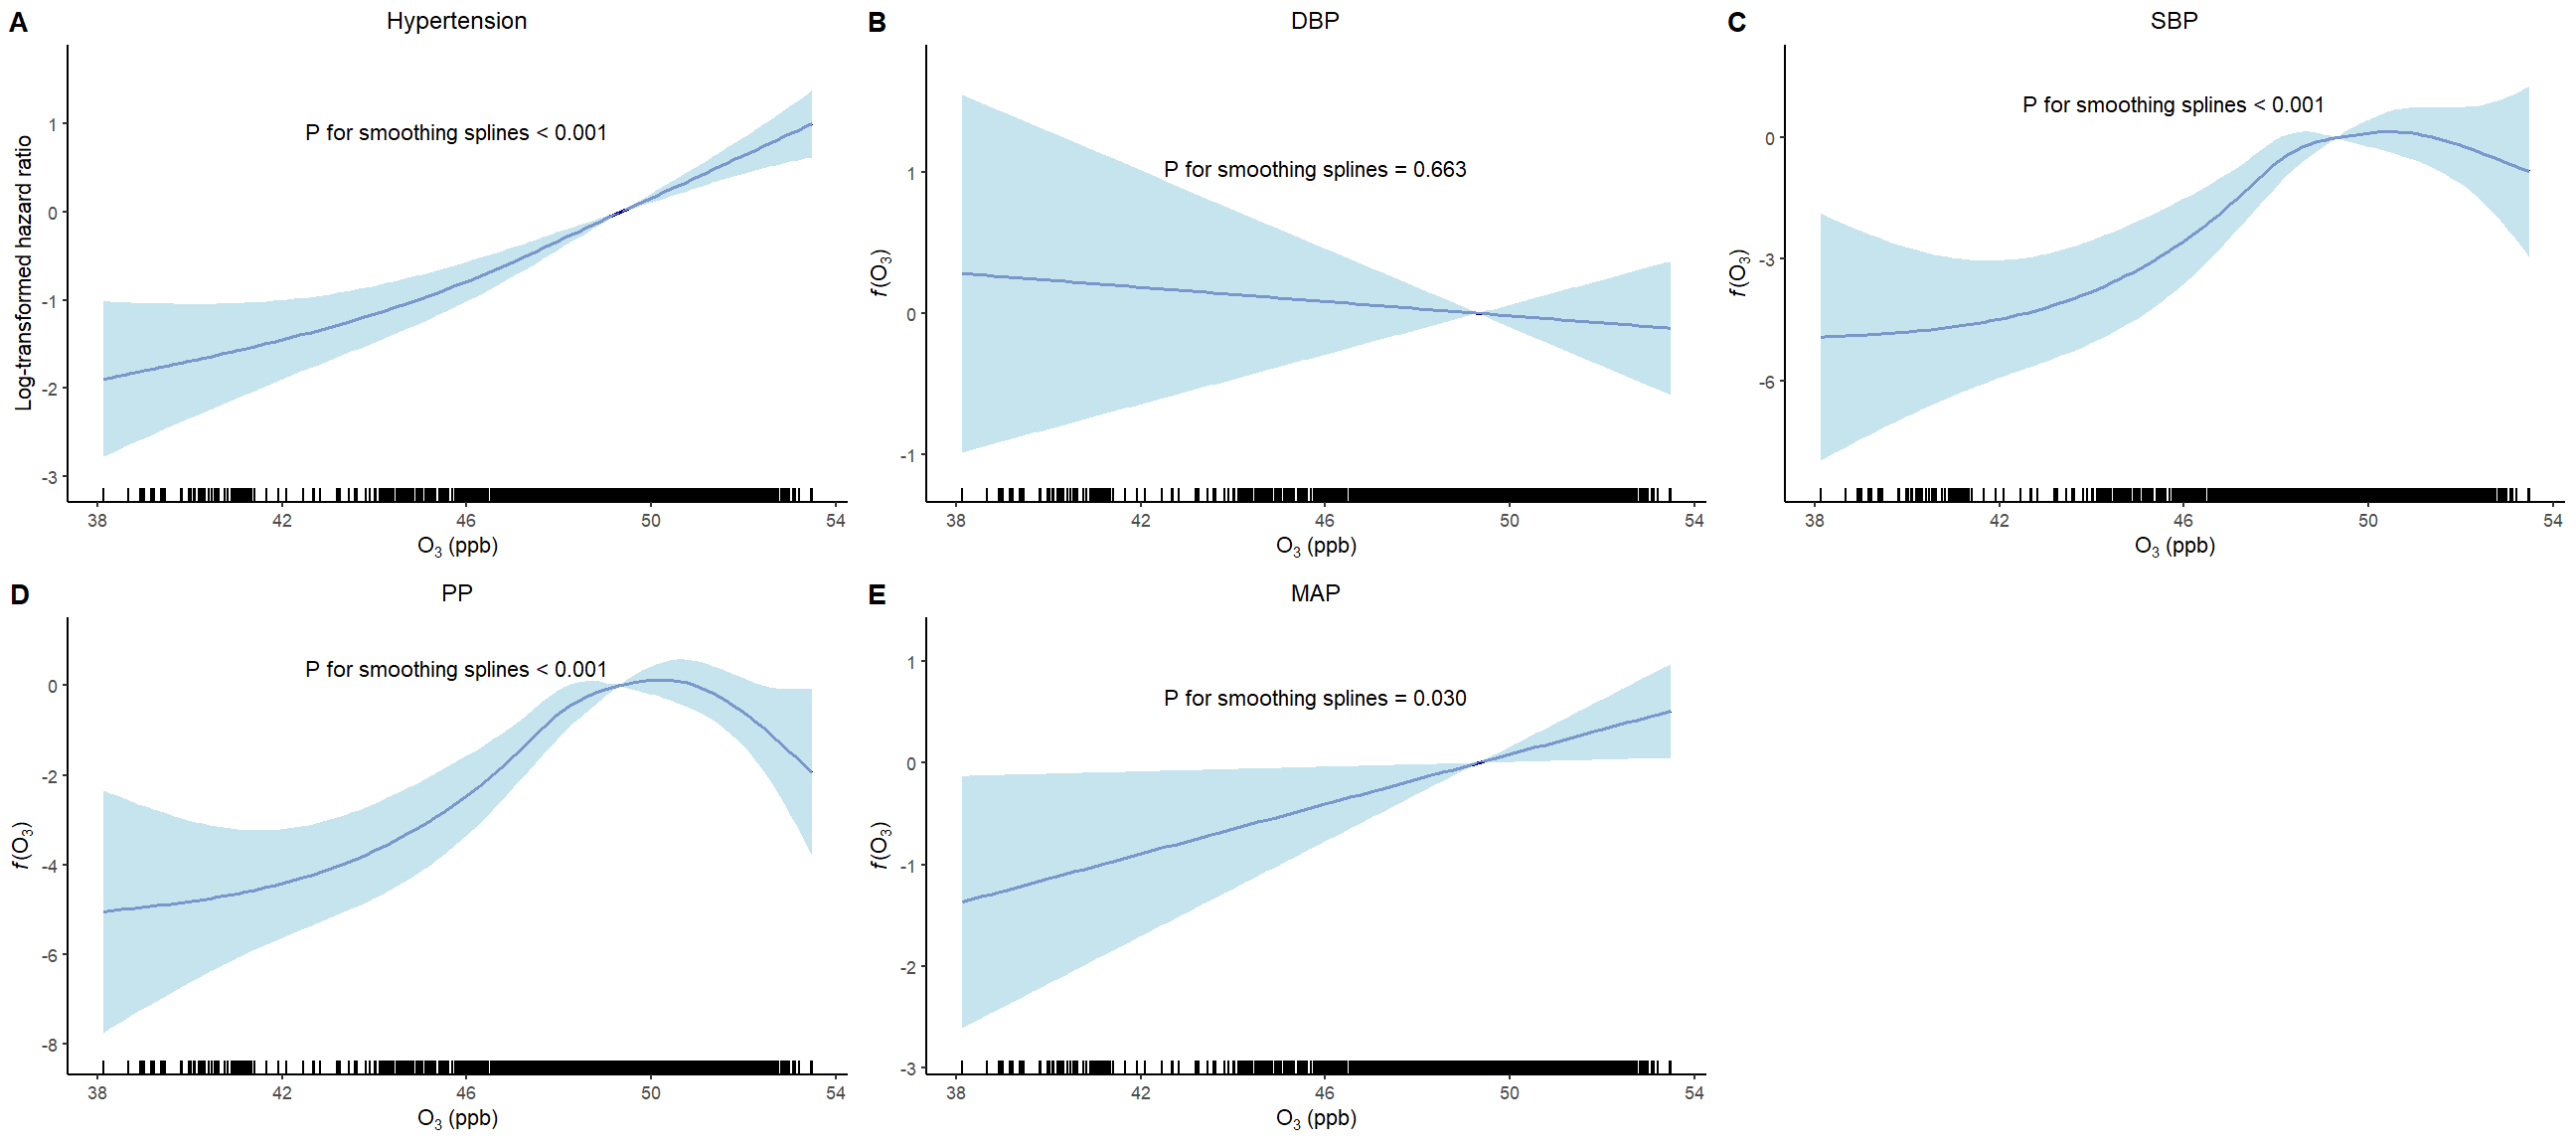


**Fig. S5.** Concentration-response curves of the association of 1-year average O3 exposure concentrations with hypertension, DBP, SBP, PP and MAP. Analyses are adjusted for age, sex, marital status, education level, BMI, family history of hypertension, daily cooking time, night sleep duration, smoking, mask usage, air purifier usage, FBG, TG, TC, LDL-C, HDL-C, CHD and cancer. Effects estimates are indicated by solid lines and 95% confidence intervals by shaded areas. Darker colors in the lower bars represent a higher sample clustering. Hazard ratios are on a logarithmic scale. Note: DBP, diastolic blood pressure; SBP, systolic blood pressure; PP, pulse pressure; MAP, mean arterial pressure; O3, ozone; ppb, parts per billion.
